1 Pore dynamics and asymmetric cargo loading in  
2 an encapsulin nanocompartment revealed by  
3 Cryo-EM and hydrogen/deuterium exchange  
4 mass spectrometry  
5  
6

7 Jennifer Ross<sup>1#</sup>, Zak McIver<sup>2</sup>, Thomas Lambert<sup>1</sup>, Cecilia Piergentili<sup>2</sup>, Kelly J.  
8 Gallagher<sup>1</sup>, Jasmine Emma Bird<sup>2</sup>, Faye L. Cruickshank<sup>1</sup>, Efrain Zarazúa-Arvizu<sup>3</sup>,  
9 Louise E. Horsfall<sup>3</sup>, Kevin J. Waldron<sup>5</sup>, Marcus D. Wilson<sup>4</sup>, C. Logan Mackay<sup>1</sup>,  
10 Arnaud Baslé<sup>5</sup>, David J. Clarke<sup>1\*</sup>, Jon Marles-Wright<sup>2\*</sup>  
11

12 *Running title: Hoch-Enc Structure*  
13  
14

15 <sup>1</sup>EaStCHEM School of Chemistry, The University of Edinburgh, Joseph Black  
16 Building, David Brewster Road, Edinburgh, EH9 3FJ.

17 <sup>2</sup>School of Natural and Environmental Sciences, Newcastle University, Newcastle  
18 upon Tyne, NE1 7RU.

19 <sup>3</sup>School of Biological Sciences, The University of Edinburgh, Edinburgh, EH9 3BF.

20 <sup>4</sup> Wellcome Centre for Cell Biology, University of Edinburgh, Michael Swann  
21 Building, Kings Buildings, Mayfield Road, Edinburgh, EH9 3JR, UK

22 <sup>5</sup>Newcastle University Biosciences Institute, Medical School, Newcastle University,  
23 Newcastle upon Tyne, NE2 4HH.  
24

25  
26 *#Current address: School of Biochemistry, University of Bristol, Biomedical Sciences*  
27 *Building, University Walk, Bristol, BS8 1TD.*  
28  
29

30 \* To whom correspondence should be addressed:

31 Jon Marles-Wright, +44(0)191 2084855, Jon.marles-wright1@ncl.ac.uk

32 David J. Clarke, +44(0)131 650 4808, Dave.clarke@ed.ac.uk  
33  
34  
35

36 **Keywords:**

37 Encapsulin, encapsulated ferritin, ferritin, ferroxidase, *Haliangium ochraceum*, cryo-  
38 EM, hydrogen-deuterium exchange (HDX), mass spectrometry (MS), metalloprotein,  
39 protein structure.  
40  
41

---

## 42 Abstract

43 Encapsulins (Enc) are protein nanocompartments which house various cargo  
44 enzymes, including a family of decameric ferritin-like proteins. Previously, we  
45 elucidated the structure and activity of these ferritin-like proteins (EncFtn) and  
46 demonstrated that they must be encapsulated in a nanocompartment for iron storage.  
47 Here, we study a recombinant *Haliangium ochraceum* Enc:EncFtn complex using  
48 electron cryo-microscopy (Cryo-EM) and hydrogen/deuterium exchange mass  
49 spectrometry (HDX-MS) to gain insight into the structural relationship between Enc  
50 and EncFtn. An asymmetric single particle reconstruction reveals four EncFtn  
51 decamers in a tetrahedral arrangement within the encapsulin nanocompartment. This  
52 leads to a symmetry mismatch between the EncFtn cargo and the icosahedral  
53 encapsulin shell. The EncFtn decamers are offset from the interior face of the  
54 encapsulin shell and are resolved at a much lower overall resolution in the final  
55 reconstruction. This flexibility, and the fixed number of EncFtn decamers sequestered  
56 within, implies that the loading of the encapsulin nanocompartment is limited by the  
57 steric effect of both engaged and free encapsulin localization sequences. Using a  
58 combination of focused refinements and HDX-MS, we observed dynamic behavior of  
59 the major five-fold pore, and show the pore opening via the movement of the  
60 encapsulin A-domain. These data can accelerate efforts to engineer the sequestration  
61 of heterologous cargo proteins and to alter the permeability of the encapsulin shell via  
62 pore modifications.  
63

## 64 Introduction

65 Cellular metabolism and reaction pathways can produce toxic by-products which  
66 can damage proteins, DNA, and lipids, or become involved in potentially harmful side-  
67 reactions. Eukaryotes use membrane-bound organelles, such as lysosomes, to  
68 prevent this damage by housing dangerous reactions in chemically privileged  
69 environments. In a similar manner, prokaryotes use large protein-based  
70 compartments to sequester such reactions and act as barrier from the cytosol  
71 (Diekmann and Pereira-Leal, 2013; Kerfeld et al., 2010). Prokaryotes use a variety of  
72 compartments such as carboxysomes, which are used for carbon dioxide fixation; and  
73 ferritins, for iron oxidation and storage (Andrews, 2010; Chiancone et al., 2004; Yeates  
74 et al., 2008).

75 One nanocompartment utilized by prokaryotes is the encapsulin system (Akita et  
76 al., 2007; Prangishvili et al., 2008). Encapsulin (Enc) nanocompartments are large,  
77 hollow icosahedral complexes which range in size from 20 nm to 42 nm (Giessen et  
78 al., 2019; He et al., 2016; Prangishvili et al., 2008). Encapsulin proteins are structurally  
79 related to the viral capsid protein (gp5) of the HK97 bacteriophage and self-assemble  
80 from a single monomer into one of three forms: 60 subunits ( $T = 1$  capsid symmetry),  
81 180 subunits ( $T = 3$  capsid symmetry) or 240 subunits ( $T = 4$  symmetry)(Akita et al.,  
82 2007; Giessen et al., 2019; McHugh et al., 2014; Prangishvili et al., 2008). Encapsulins  
83 share a common feature of housing a cargo enzyme, such as ferritin-like proteins  
84 (encapsulated ferritins, EncFtn), iron-mineralizing encapsulin-associated firmicute  
85 (IMEF), or dye-decolorizing peroxidases(Giessen et al., 2019; Giessen and Silver,  
86 2017). Cargo enzymes are directed inside the encapsulin nanocompartment by a  
87 terminal localization sequence (LS) which binds to the interior face of the  
88 encapsulin(Prangishvili et al., 2008; Tamura et al., 2015). Encapsulins and their cargo  
89 proteins are found throughout the bacterial and archaeal domains in species inhabiting  
90 a range of environmental niches; consequently, the proteins are stable in diverse  
91 physical conditions(Akita et al., 2007; He et al., 2019; Rahmanpour and Bugg, 2013;  
92 Snijder et al., 2016). For these reasons, the encapsulins have attracted considerable  
93 interest for biotechnological applications, through their ability to separate potentially  
94 hazardous heterologous reactions from the native cytosol(Jenkins and Lutz, 2021; Lau  
95 et al., 2018).

96 The EncFtn cargo proteins are of particular interest, as they differ from their  
97 classical ferritin relatives. Although both proteins oxidize iron using a conserved  
98 catalytically active ferroxidase center (FOC), they have remarkably different structural  
99 architectures. Classical ferritins oxidize ferrous iron, Fe(II), into a mineral ferric form,  
100 Fe(III), which is then stored within a 24-meric 12 nm nanocage (Andrews, 2010;  
101 Recalcati et al., 2017). In contrast to this, the EncFtn proteins have an annular  
102 structure formed from a pentamer of dimers with the FOC active sites located at a  
103 dimer interface (He et al., 2019, 2016). EncFtn oxidizes iron in a similar manner to  
104 other ferritins, but due to its open structure, it must be associated with an encapsulin  
105 nanocage to act as an iron store(He et al., 2016). Together the encapsulin EncFtn  
106 complex (Enc:EncFtn) can perform both the oxidation and storage functions of  
107 classical ferritins. However, due to its increased size when compared to classical  
108 ferritins, the Enc:EncFtn complex has the potential to house significantly greater  
109 quantities of iron, and has been described as an iron megastore(McHugh et al., 2014).

110 Although there have been several structural studies on encapsulins, a number of  
111 key questions remain unanswered. Most notably for the EncFtn containing encapsulin  
112 nanocompartments, the structural relationship between the encapsulin shell and the  
113 EncFtn cargo protein is unknown. Our previous studies have focused primarily on an

114 encapsulated ferritin system from *Rhodospirillum rubrum*, where we determined the  
115 crystal structure of EncFtn and established its activity as a ferroxidase enzyme(He et  
116 al., 2016). Further studies on EncFtn systems revealed a shared structural  
117 organization for bacterial and archaeal EncFtn complexes(He et al., 2019).  
118 Recombinantly produced encapsulin from *R. rubrum* was found to assemble into a  
119 shell with a diameter of 24 nm, consistent with a  $T = 1$  icosahedral arrangement. When  
120 co-expressed with its respective encapsulated ferritin protein, the encapsulin recruited  
121 its cargo protein to the nanocompartment lumen. Previously, we proposed a model for  
122 the Enc:EncFtn complex structure based on the unique structure adopted by the  
123 EncFtn protein and the orientation of the ferroxidase center(He et al., 2016). In our  
124 model, the D5 symmetric decamer of EncFtn is aligned with the pentameric vertices  
125 on the encapsulin shell, such that the inner circumference of EncFtn is aligned with  
126 the 5-fold pore of the encapsulin nanocompartment. This would result in one EncFtn  
127 being positioned at each of the internal five-fold vertices, with a total of 12 EncFtn  
128 decamers per encapsulin nanocage.

129 Herein, we investigate the structure of the Enc:EncFtn nanocompartment from the  
130 halophilic bacterium *Haliangium ochraceum*, to gain a better understanding of the  
131 complex. Using the complementary structural biology techniques of cryogenic electron  
132 microscopy (cryo-EM), native mass spectrometry (MS), and hydrogen-deuterium  
133 exchange (HDX) MS, we study the structural relationship between Enc and EncFtn.

134 We present the first cryo-EM structure of the Enc:EncFtn nanocompartment, which  
135 reveals the stoichiometry of cargo loading and structural arrangement of the EncFtn  
136 proteins within the encapsulin shell. This model affords insight into the loading capacity  
137 and dynamics of the Enc:EncFtn nanocompartment system.

138  
139



## 140 Results

### 141 **Recombinant *Haliangium ochraceum* encapsulin complexes form regular** 142 **nanocompartments that recruit active EncFtn cargoes**

143 In order to gain an understanding of the relationship between encapsulin  
144 nanocompartments and their EncFtn cargoes, the *Haliangium ochraceum* Enc:EncFtn  
145 nanocompartment was chosen as our model system. This was primarily due to the  
146 high yields and ease of purification when compared to the *R. rubrum* homologue.

147 Constructs for the production of empty and EncFtn-loaded encapsulin  
148 nanocompartments were produced for recombinant protein expression in *Escherichia*  
149 *coli*. The protein complexes were purified by heat treatment, followed by anion  
150 exchange and size-exclusion chromatography (**Figure 1A and Figure 1 – figure**  
151 **supplement 1Ai, Aii, Bi and Bii**).

152 The molecular masses of the protein constituents of the Empty-Enc and  
153 Loaded-Enc assemblies were determined by LC-MS (**Table 1**). MS analysis of the  
154 Empty-Enc assembly revealed a single charge state distribution corresponding to a  
155 monomer of the encapsulin protein. MS analysis of the Loaded-Enc revealed three  
156 charge state distributions present, with deconvoluted masses consistent with the  
157 encapsulin protein monomer, a monomer of EncFtn and a dimer of EncFtn (**Figure 1**  
158 **– Figure supplement 1Aiii and Biii**). These results indicate that the Loaded-Enc  
159 sample contained both the encapsulin and EncFtn cargo proteins, whilst Empty-Enc  
160 has only the encapsulin protein.

161 The assembly of the purified encapsulin nanocompartments was confirmed  
162 through visualization by negative stain transmission electron microscopy (TEM)  
163 (**Figure 1B**). Both empty and EncFtn loaded encapsulins assembled into regular  
164 nanocompartments, with an average diameter of approximately 21 nm, consistent with  
165 other  $T=1$  type encapsulins (**Figure 1Aiv and 1 Biv**)(Prangishvili et al., 2008; Putri et  
166 al., 2017; Xiong et al., 2020). The solution behavior of both complexes is consistent  
167 with the TEM observations, with both complexes eluting from a size-exclusion column  
168 at the same volume, indicating similar hydrodynamic radii (**Figure 1 – Figure**  
169 **Supplement 1Ai and Bi**). The micrographs of the EncFtn loaded encapsulin reveal a  
170 regular internal density visible within the nanocompartment, suggesting that the  
171 EncFtn cargo has been encapsulated in an organized manner.

172 Ferroxidase assays confirmed the ability of the EncFtn loaded encapsulin  
173 nanocompartment to convert Fe(II) to Fe(III) (**Figure 1C**). This result is consistent with  
174 our previous observations for the *Rhodospirillum rubrum* Enc:EncFtn encapsulin  
175 complex(He et al., 2016). The empty encapsulin, which lacks the EncFtn cargo is  
176 enzymatically inactive.

177 Taken together, these data demonstrate that functionally active EncFtn has been  
178 successfully loaded into the encapsulin nanocompartment during expression in the  
179 heterologous *E. coli* host.

180

### 181 **The cryo-EM structure of the encapsulin EncFtn complex**

182 Motivated by the apparent interior density in the EncFtn loaded encapsulin  
183 complex, we performed single particle cryo-EM of the Enc:EncFtn complex. Consistent  
184 with previously published X-ray crystallographic and cryo-EM derived encapsulin  
185 models, an initial reconstruction was produced with imposed I1 symmetry (**Figure 2,**  
186 **Figure 2 – figure supplement 1, and Figure 2 – figure supplement 2**) (Akita et al.,  
187 2007; Giessen et al., 2019; Nichols et al., 2020; Prangishvili et al., 2008; Xiong et al.,  
188 2020). This resulted in a reconstruction with a global resolution of 2.4 Å as determined  
189 by the gold-standard fourier shell correlation at 0.143 (GS-FSC) (**Figure 2 – figure**

190 **supplement 1D**). The reconstruction displays a  $T = 1$  icosahedral arrangement of sixty  
191 encapsulin monomers, with clearly resolved secondary structure elements with small  
192 pores at, or close to, the 2-, 3-, and 5-fold symmetry axes where protein monomers  
193 interact with each other (**Figure 2A**). Regions of the reconstruction around the  
194 icosahedral five-fold axes displayed a lower resolution than the other regions of the  
195 structure in a local resolution map (**Figure 2B**). This is consistent with observations of  
196 local resolution maps for the *Quasibacillus thermotolerans* encapsulin  
197 reconstruction (Giessen et al., 2019). The monomer of the encapsulin  
198 nanocompartment from the reconstruction displays a HK97-fold typical for encapsulins  
199 (**Figure 2C**). The orientation of the E-loop (extended loop) of the HK97 phage-like fold  
200 determines the topology of the nanocompartments. The  $T = 1$  Family 1 encapsulins  
201 have their E-loop shifted away compared to the E-loops of those from the HK97  
202 bacteriophage and other encapsulins (such as, the  $T = 1$  Family II Enc from  
203 *Synechococcus elongatus*; the  $T = 3$  Enc from *Pyrococcus furiosus* and the  $T = 4$  from  
204 *Quasibacillus thermotolerans*). Loaded-Enc has an E-loop orientation similar to that of  
205 the  $T = 1$  Family 1 Enc from *Thermotoga maritima* (**Figure 2C**).

206 With the imposition of I1 symmetry on the reconstruction, the EncFtn cargo is  
207 not visible. This suggests that the organization of the EncFtn protein within the  
208 encapsulin shell does not conform to icosahedral symmetry and is rotationally  
209 averaged through our symmetry-imposed processing (**Figure 2 - figure supplement**  
210 **1C**).

### 211 212 **The encapsulin nanocompartment recruits four EncFtn decamers to its lumen**

213 To gain insight into the structural relationship between the encapsulin shell and its  
214 EncFtn cargo protein, a reconstruction was produced with no imposed symmetry  
215 averaging (**Figure 3 and Figure 2 – figure supplement 2**). The resolution of the final  
216 C1 map is 3.1 Å at the 0.143 FSC threshold (**Figure 3A and Figure 3 - Figure**  
217 **Supplement 1A**). Interestingly, the EM map revealed four distinct densities within the  
218 encapsulin nanocompartment lumen, which are consistent in size and shape with four  
219 EncFtn decamers (**Figure 3 and Figure 3 - figure supplement 1B**). This is  
220 significantly fewer than the twelve EncFtn decamers in our proposed  $T=1$  Enc:EncFtn  
221 nanocompartment model (He et al., 2016). Interestingly, despite extensive 3D  
222 classification the observed internal density did not improve, suggesting it is flexibly  
223 tethered to the inner face of the encapsulin shell.

224 A local resolution map calculated for the asymmetric reconstruction indicates a  
225 degree of flexibility at the pentameric pores compared to the trimeric pores of the  
226 encapsulin shell (**Figure 3A**). The interior of the nanocompartment shows a significant  
227 falloff in resolution from the inner face of the encapsulin shell to the EncFtn densities.  
228 This is consistent with the tethering of the EncFtn to the encapsulin nanocompartment  
229 via its localization sequence, but with some degree of conformational freedom of the  
230 EncFtn decamer with respect to the encapsulin shell. There is also some fuzzy interior  
231 density which is consistent with the untethered localization sequences.

232 The EncFtn decamers are located approximately 3 nm away from the encapsulin  
233 interior wall, which corresponds to the linker region between the main EncFtn domain  
234 and the localization sequence on the EncFtn C-terminus (**Figure 3 – figure**  
235 **supplement 1C**). The extended localization sequence of the EncFtn protein acts to  
236 offset it from the inner face of the encapsulin shell, an observation consistent with  
237 previous reports of the IMEF encapsulin complex from *Q. thermotolerans* (Giessen et  
238 al., 2019). Due to the dynamic nature of the EncFtn within the encapsulin it was not  
239 possible to trace the path of the localization sequence to its binding site.

240 The four densities within the encapsulin nanocompartment are discrete, and  
241 thus permit the docking of the *H. ochraceum* EncFtn crystal structure in this region  
242 (PDB: 5N5F)(He et al., 2019) (**Figure 4B** and **Figure 4 - figure supplement 1C**). The  
243 decameric, annular crystal structure fits well into the EncFtn density; although at the  
244 observed resolution, it is not possible to fix the rotational alignment around the 5-fold  
245 symmetry axis of the EncFtn. Interestingly, the four EncFtn decamers are in a  
246 tetrahedral arrangement within the encapsulin nanocompartment, whereas the five-  
247 fold axes of the EncFtn complex are aligned with the three-fold tetrahedral axes  
248 (**Figure 3B**). This results in a double symmetry mismatch between the icosahedral  
249 shell and the EncFtn decamers in the complex.

250 This symmetry mismatch is particularly interesting, as the pores of the  
251 encapsulin nanocompartment allow substrate access to the nanocompartment interior  
252 and subsequently EncFtn(Williams et al., 2018). As there is no common symmetry  
253 between the pores in the encapsulin shell and the EncFtn decamers, the latter are  
254 found in non-equivalent environments in terms of iron availability. Analysis of the  
255 relationship between the EncFtn decamers and the inner face of the encapsulin shell  
256 reveals two distinct EncFtn environments (**Figure 3 - figure supplement 2**). The first  
257 EncFtn environment is shared by two EncFtn decamers and is in line with the five-fold  
258 pore of the encapsulin nanocompartment (EncFtn 1 and 2 in **Figure 3 - figure**  
259 **supplement 2**). The shared symmetry of the Enc nanocompartment five-fold pores  
260 and of the EncFtn D5 annular structure in these positions is consistent with our  
261 previously proposed structural hypothesis for the Enc:EncFtn relationship(He et al.,  
262 2016). However, the symmetry-breaking tetrahedral arrangement of the EncFtn  
263 decamers creates a second environment shared by the remaining two EncFtn  
264 decamers, where they are offset between five-fold and three-fold axes of the  
265 icosahedral encapsulin shell (EncFtn 3 and 4 in **Figure 3 - figure supplement 2**).

266 With the observation that an encapsulin nanocompartment can house four  
267 EncFtn decamers, which each have a calculated volume of around 100 nm<sup>3</sup>, the ‘free’  
268 volume within an encapsulin nanocompartment is around 3800 nm<sup>3</sup>. This is  
269 significantly larger than the classical ferritin lumen, which has interior volume of 270  
270 nm<sup>3</sup>. This is in line with our previous biochemical studies, which showed that for our  
271 experimental system that the Enc:EncFtn complex can hold approximately 4000 Fe(III)  
272 ions, whilst classical ferritin only has a capacity of 500 iron ions(He et al., 2016).

273

### 274 **Structural dynamics in the pentameric vertices of the encapsulin shell**

275 To further investigate the apparent conformational flexibility of the encapsulin shell  
276 at the pentameric vertices in the reconstructions, we performed symmetry expansion  
277 on the I1 refined particle set, followed by masked 3D-classification without alignment  
278 centered on the vertex. A number of distinct conformations were revealed, and the  
279 most extreme of these were subjected to 3D refinement with local searches (**Figure**  
280 **4, Figure 4 – figure supplement 1, and Figure 2 – figure supplement 2**). This  
281 resulted in an ‘open’ pentamer conformation of 2.4 Å resolution and a ‘closed’  
282 conformation of 2.3 Å, allowing for fitting of residue side chains and the modelling of  
283 some water molecules (**Figure 4 – figure supplement 2**).

284 The ‘open’ conformation, has a five-fold pore with an aperture diameter of  
285 approximately 24 Å, while in the ‘closed’ conformation the aperture is reduced to 9 Å  
286 diameter. To understand the structural changes taking place in the transition between  
287 these conformations, an atomic model of the encapsulin protein was refined against  
288 both maps (**Table 6**). The two models show a significant movement in the A-domain,  
289 with a pivoting around the hinge points connecting this domain to the P-domain. This

290 opens the pore like an iris (**Figure 4**). In the open conformation, the pore loop region  
291 (residues 182 - 189) is not well defined in the density; however, it is tightly locked in  
292 the closed conformation, with Asp186 forming the outer boundary of the pore and  
293 Tyr188 and Lys192 forming the inner bounds (**Figure 4 - figure supplement 3**). The  
294 tyrosine is well conserved among the family 1  $T = 1$  encapsulins, while the lysine is  
295 substituted for a glutamine in the *R. rubrum* encapsulin (**Figure 4 - figure**  
296 **supplement 4**). The family 2  $T = 1$  encapsulin from *Synechococcus elongatus* has a  
297 five-residue sequence insertion in this region, which forms an extended linker between  
298 secondary structure elements, rather than a distinct loop within the pore.

299 In the *H. ochraceum* encapsulin the five-fold pore has a negative charge on the  
300 exterior of the encapsulin shell and positive charge on the interior in both the open and  
301 closed conformations (**Figure 4 - figure supplement 4** and **Figure 4 - figure**  
302 **supplement 5**). The closed conformation is consistent with observations from the  
303 crystal structure of the *T. maritima* encapsulin (Prangishvili et al., 2008) and high  
304 resolution cryo-EM structures of other encapsulins (Giessen et al., 2019; Nichols et al.,  
305 2020). However, this is the first time that an ‘open’ pore-conformation has been  
306 observed in an encapsulin protein. This observation has important implications for  
307 efforts to engineer the pores of encapsulin nanocages. Where early efforts to widen  
308 the five-fold pores have demonstrated an increase in mass-transport of model  
309 substrates across the encapsulin shell (Williams et al., 2018), more recent efforts to  
310 modify the pores have shown that the shell does not act as a strong barrier to the  
311 passage of the small lanthanide substrates tested. Our results provide an explanation  
312 for these observations, where a dynamic and flexible pore would not act as a barrier  
313 to the passage of small ligands, such as divalent cations, across the shell. They would  
314 also be able to accommodate a wide range of sizes of potential ligands for engineered  
315 nanocages.

316 Additionally, these focused refinements of the pentameric subunits allowed us to  
317 build and sequence the ‘<sup>117</sup>GSLGIGSLR<sub>125</sub>’ peptide from the EncFtn protein (**Figure**  
318 **5**). This region of the localization sequence forms a network of hydrophobic  
319 interactions with the inner face of the P-domain of a single encapsulin monomer, with  
320 further stabilization by a number of water-mediated backbone contacts. The core  
321 GxLGlxL motif found in this region of the localization sequence is conserved between  
322 the *H. ochraceum* EncFtn and other proteins in the family and is observed in the crystal  
323 structure of the *T. maritima* encapsulin (Prangishvili et al., 2008).

324

### 325 ***Dynamics of the 5-fold encapsulin pore through hydrogen/deuterium exchange*** 326 ***mass spectrometry.***

327 To further investigate the dynamic nature of the five-fold pore of the encapsulin  
328 shell and the docking of the EncFtn localization sequence to the interior of the  
329 nanocompartment, hydrogen/deuterium exchange mass spectrometry (HDX-MS) was  
330 performed. The extent of backbone-amide hydrogen exchange was determined at  
331 seven time points (0 seconds, 10 seconds, 30 seconds, 5 minutes, 30 minutes, 4  
332 hours, and 24 hours) for both Empty-Enc and Loaded-Enc. By calculating the rate of  
333 hydrogen exchange throughout the protein, regions that differ in solvent exposure  
334 and/or dynamics can be detected.

335 HDX-MS analysis of the encapsulin nanocompartment resulted in 40 pepsin  
336 peptides, which constituted a protein sequence coverage of 85%, with peptide  
337 redundancy of 2.28 (**Table 7**, **Table 8** and **Figure 6 - figure supplement 1**). The  
338 encapsulin nanocompartment displayed variable exchange rates throughout the  
339 protein sequence and regions of the protein displaying elevated HD exchange rates



340 were clearly evident. Overlaying these local HD exchange rates onto the  
341 reconstruction of the encapsulin structure revealed that the regions of high exchange  
342 were located around pentameric vertices. (**Figure 6**). This was most notable with the  
343 peptide spanning the region between amino acids 180-196, which includes the five-  
344 fold pore loop (**Figure 6 - figure supplement 2**). In contrast, lower rates of HDX are  
345 observed at the 2-fold interface and the potential 3-fold pore (**Figure 6**). These findings  
346 are in agreement with our cryo-EM structural analyses and support the proposed  
347 conformational flexibility at the 5-fold pore.

348 Comparison of the HD exchange rates of Empty-Enc and Loaded-Enc revealed  
349 similar exchange profiles throughout the encapsulin protein sequence, suggesting that  
350 cargo loading has little effect on the overall architecture and dynamics of the  
351 assembled nanocompartment shell (**Table 7**, **Table 8**, and **Figure 6 - figure**  
352 **supplement 3**). However, after prolonged exchange times (4 hours), the Loaded-Enc  
353 exhibited areas with a modest reduction in exchange when compared to the Empty-  
354 Enc. Notably, several peptides in the N-terminal region displayed reduced exchange  
355 rates in Loaded-Enc; for example, the peptide covering amino acids 21-37 displayed  
356 almost twelve percent reduction. Mapping the position of this region onto our  
357 encapsulin reconstruction highlights that this peptide is located on the interior face of  
358 the nanocompartment and included the proposed binding site for the localization  
359 sequence of EncFtn (**Figure 5**). In our model, the maximum engagement of the  
360 localization sequence binding sites would be only one third of the potential sixty sites,  
361 with only twenty localization sequences from the EncFtn oriented towards the inner  
362 face of the encapsulin shell. A reduction in exchange across in this region may be a  
363 consequence of shielding by the extended EncFtn localization sequence.  
364

## 365 Discussion

366  
367 Our cryo-EM reconstruction of an Enc:EncFtn nanocompartment complex reveals  
368 key areas of divergence from a true icosahedral complex with important functional  
369 consequences. The asymmetric reconstruction showed that the encapsulin  
370 nanocompartment sequesters four decamers of EncFtn within its lumen. In our  
371 recombinant system, with EncFtn produced in excess, this likely represents a  
372 maximum loading capacity for the Enc:EncFtn nanocompartments. The symmetry  
373 breaking tetrameric arrangement of the EncFtn decamers within the encapsulin shell  
374 leads to two distinct environments for EncFtn, with two decamers aligned at the five-  
375 fold symmetry axes, and the remaining two residing between three- and five-fold axes  
376 (**Figure 3 – Figure Supplement 2**). The consistent observation of a gap between the  
377 encapsulin shell and encapsulin cargo proteins implies that the loading and capacity  
378 of encapsulins is clearly limited by the steric effect of the offset of the cargo protein  
379 from the shell, and from the unengaged localization sequences at the core of the  
380 nanocompartment. This has implications for efforts to target heterologous proteins to  
381 the encapsulin nanocage; effectively setting a limit on the volume of protein that can  
382 be accommodated within, which is much lower than the total volume of the lumen of  
383 the nanocage.

384 These observations have functional implications for the oxidation and storage of  
385 iron within the Enc:EncFtn nanocompartment. The EncFtn decamers are in non-  
386 equivalent positions, and thus have different relationships to the pores of the  
387 encapsulin shell. Therefore, if the pores limit the diffusion of substrates, the EncFtn  
388 decamers would be subjected to different chemical environments. Furthermore, both

389 the engaged and unengaged localization sequences present a ‘soft’ steric barrier to  
390 the diffusion of substrates. It is notable that the ferroxidase activity of the Enc:EncFtn  
391 complex is significantly higher than the isolated EncFtn protein. While it is not possible  
392 to make mechanistic conclusions from our model, the complex interactions with the  
393 components of the encapsulin nanocompartment clearly enhance the iron oxidation  
394 activity of the EncFtn protein.

395 Our data were collected on apo-Enc:EncFtn complexes, and thus is it not possible  
396 to infer the nature of the iron mineralization pathway within the encapsulin nanocage.  
397 Further, careful work must be performed to titrate iron into the complex prior to  
398 structural analysis to gain insight into the flow of metal ions from the exterior to the  
399 interior of the encapsulin and to determine if metalation influences the conformational  
400 flexibility of the EncFtn within the encapsulin nanocage, as we have demonstrated for  
401 isolated EncFtn proteins(He et al., 2019, 2016; Piergentili et al., 2020). Finally, the  
402 nature of the iron mineral and its localization within the encapsulin nanocage is still to  
403 be determined.

404 These cryo-EM and HDX-MS data illustrating a highly dynamic five-fold pore in  
405 the encapsulin shell have major implications for efforts to engineer recombinant  
406 encapsulins for improved access for both native and non-native substrates. The  
407 limitations of previously published studies where the five-fold pore is modified for  
408 altered substrate access can be explained by a highly dynamic pore structure that is  
409 not particularly discriminatory for small molecules. Our work suggests new hypotheses  
410 for engineering pore selectivity, through modifications to the hinge regions between  
411 the P- and A-domains, which are responsible for the opening of the pore.

412  
413  
414  
415



416 Materials and Methods  
417

| <b>Key Resources Table</b>                            |                            |                                   |                    |                                                  |
|-------------------------------------------------------|----------------------------|-----------------------------------|--------------------|--------------------------------------------------|
| <b>Reagent type (species) or resource</b>             | <b>Designation</b>         | <b>Source or reference</b>        | <b>Identifiers</b> | <b>Additional information</b>                    |
| strain, strain background ( <i>Escherichia coli</i> ) | BL21(DE3)                  | Cambridge Biosciences             | 60401              | chemically competent                             |
| recombinant DNA reagent                               | CIDAR MoClo Kit            | Addgene                           | Kit # 1000000059   | vectors for protein expression in <i>E. coli</i> |
| sequence-based reagent                                | gBlocks used in this study | Integrated DNA Technologies (IDT) |                    |                                                  |
| commercial assay or kit                               | Pierce™ BCA Assay kit      | Thermo Fisher Scientific          | 23225              |                                                  |
| chemical compound, drug                               | Lysozyme                   | Sigma-Aldrich                     | L6876              |                                                  |
| chemical compound, drug                               | Benzonase                  | Sigma-Aldrich                     | E1014              |                                                  |
| chemical compound, drug                               | Tris                       | Roche                             | 1078976001         | Used for casting SDS-PAGE gels                   |
| chemical compound, drug                               | Glycerol                   | VWR                               | 24387.326          | Used for casting SDS-PAGE gels                   |
| chemical compound, drug                               | Sodium dodecyl sulfate     | Fisher bioagents                  | BP2436-1           | Used for casting SDS-PAGE gels                   |

|                         |                                              |                 |            |                                |
|-------------------------|----------------------------------------------|-----------------|------------|--------------------------------|
| chemical compound, drug | Ammonium persulfate                          | Sigma-Aldrich   | A3678-100G | Used for casting SDS-PAGE gels |
| chemical compound, drug | TEMED                                        | Severn Biotech  | 20-3000-01 | Used for casting SDS-PAGE gels |
| chemical compound, drug | Bis-Acrylamide 30%                           | Severn Biotech  | 20-2100-10 | Used for casting SDS-PAGE gels |
| chemical compound, drug | Uranyl acetate                               | Agar Scientific | AGR1260A   |                                |
| chemical compound, drug | FeSO <sub>4</sub> .7H <sub>2</sub> O; Fe(II) | Sigma-Aldrich   | 1270355    |                                |
| chemical compound, drug | Deuterium oxide                              | Sigma Aldrich   | 7789-20-0  |                                |
| chemical compound, drug | Potassium phosphate monobasic                | Sigma Aldrich   | 7778-77-0  |                                |
| chemical compound, drug | Potassium phosphate dibasic                  | Sigma Aldrich   | 7758-11-4  |                                |
| chemical compound, drug | Formic acid 98 - 100% (HPLC grade)           | Sigma Aldrich   | 64-18-6    |                                |
| software, algorithm     | Prism 9                                      | GraphPad        |            |                                |
| software, algorithm     | Origin 2016                                  | OriginLab       |            |                                |

|                     |                                 |                                             |             |  |
|---------------------|---------------------------------|---------------------------------------------|-------------|--|
| software, algorithm | Fiji                            | Schindelin et al., 2012                     |             |  |
| software, algorithm | MassLynx                        | Waters                                      | Version 4.1 |  |
| software, algorithm | UCSF Chimera                    | Pettersen et al., 2004                      |             |  |
| software, algorithm | UCSF ChimeraX                   | Goddard et al., 2018                        |             |  |
| software, algorithm | Relion                          | Scheres, 2012                               | Version 3.1 |  |
| software, algorithm | MotionCor2                      | Zheng et al., 2017                          |             |  |
| software, algorithm | CTFFIND4                        | Rhou and Grigorieff, 2015                   |             |  |
| software, algorithm | Phaser                          | McCoy et al., 2007(McCoy et al., 2007)      |             |  |
| software, algorithm | Phenix.autobuild                | Adams et al., 2019(Liebschner et al., 2019) |             |  |
| software, algorithm | Phenix.refine                   | Afonine et al., 2018(Afonine et al., 2018b) |             |  |
| software, algorithm | Coot                            | Emsley et al., 2010(Emsley et al., 2010)    |             |  |
| software, algorithm | Proteinlynx Global Server 3.0.3 | Waters                                      |             |  |
| software, algorithm | Dynamx 3.0                      | Waters                                      |             |  |

|       |                                                   |                                             |          |      |
|-------|---------------------------------------------------|---------------------------------------------|----------|------|
| other | 200 mesh copper grids with formvar/carbon support | TAAB                                        | F077/025 |      |
| other | 200 mesh gold grids with 2/2 holey carbon         | Quantifoil (purchased from Agar Scientific) | AGS173-8 |      |
| other | HiTrap Q FF anion; anion exchange column          | Cytiva                                      |          | 1 mL |
| other | HiPrep™ 16/60 Sephacryl® S-400 HR                 | Cytiva                                      |          |      |

418

419

#### 420 ***Cloning of encapsulin expression constructs***

421 The *Haliangium ochraceum* encapsulin and encapsulated ferritin protein  
 422 expression constructs were based on the Hoch\_3836 and Hoch\_3837 genes and were  
 423 codon optimized for expression in *Escherichia coli* and synthesized as CIDAR MoClo  
 424 compatible gBlocks by Integrated DNA Technologies (IDT) (**Table 2**). The gBlocks  
 425 were assembled into a Level 0 CIDAR MoClo storage vector (Iverson et al., 2015),  
 426 DVA\_CD, for subsequent use. The coding sequences for the encapsulin and the  
 427 EncFtn were assembled into expression cassettes in the level 1 backbones DVK\_AE  
 428 and DVK\_EF respectively, each with T7 promoter and transcription terminator parts.  
 429 The resulting expression cassettes were then combined into the DVA\_AF backbone  
 430 to produce a co-expression plasmid. All assembled plasmids were sequence verified  
 431 by Sanger sequencing by Eurofins Genomics. The protein sequences for each  
 432 construct are listed in **Table 3**.

433

#### 434 ***Protein expression***

435 The Empty-Enc and Loaded-Enc expression plasmids were transformed into *E.*  
 436 *coli* BL21(DE3) cells and grown overnight at 37 °C on LB-agar plates containing  
 437 appropriate selection antibiotics (kanamycin for Empty-Enc and ampicillin for Loaded-  
 438 Enc). A single colony of cells was added to 1 L of autoinduction media (Studier, 2005)  
 439 supplemented (**Table 4**) with appropriate antibiotic and grown for 38 hours at 37 °C  
 440 with shaking at 200 rpm. Cells were harvested by centrifugation at 12,000 ´ g.

441

#### 442 ***Encapsulin nanocompartment purification***

443 *E. coli* cell pellets expressing the empty-Enc and loaded-Enc constructs were  
 444 resuspended in 10 × v/w of lysis buffer (20 mM HEPES, pH 8; 2 mM MgCl<sub>2</sub>; 1 mg/ml  
 445 lysozyme, and benzonase, 12.5 – 25 units/mL). Cells were lysed by sonication whilst  
 446 on ice; sonication was carried out in six 1-minute cycles (30 seconds sonication, 30  
 447 seconds rest). The lysate was clarified by centrifugation at 20,000 ´ g for 1 hour, 4 °C.

448 The supernatant from cell lysis was heated to 85 °C for 10 minutes in a water  
 449 bath and transferred to a 4 °C ice bath for 10 minutes. The supernatant was then  
 450 collected after centrifugation at 10,000 g for 1 hour.

451 Anion exchange chromatography of the clarified supernatant was performed  
452 using a 1 mL HiTrap Q Sepharose FF column from Cytiva on an ÄKTA™ start. The  
453 column and ÄKTA™ start system were equilibrated with QA buffer (20 mM HEPES,  
454 pH 8.0) and the protein sample was loaded. Unbound proteins were removed by  
455 washing with QA buffer. Bound proteins were eluted by QB buffer (20 mM HEPES, pH  
456 8.0, 1 M NaCl) over a linear gradient of 0-100% QB over 15 column volumes. Flow-  
457 through fractions containing the sample were subjected to SDS-PAGE to identify those  
458 containing the protein of interest. These fractions were pooled and concentrated using  
459 centrifugal concentrators with a 30 kDa nominal molecular weight cut off (Vivaspin).

460 Pooled and concentrated samples from the anion exchange step were loaded  
461 on a gel filtration column (Sephacryl 400, Cytiva) equilibrated with SEC buffer (20 mM  
462 HEPES, pH 8.0, 150 mM NaCl). Fractions eluting from the column containing the  
463 desired protein, as identified by SDS-PAGE were pooled and concentrated as above.  
464 Protein aliquots were flash cooled in liquid nitrogen and stored at -80 °C (**Figure 1 –**  
465 **figure supplement 1Ai, Aii, Bi and Bii**). (He et al., 2019, 2016).

### 466 ***Negative stain TEM***

467 Purified encapsulin nanocompartments were initially imaged by negative stain  
468 TEM. Continuous carbon/formvar coated copper grids (200 mesh) were glow-  
469 discharged for 30 seconds using a Pelco glow discharge system. 5 µL Enc was  
470 pipetted onto the glow-discharged grids and excess liquid was removed after 30  
471 seconds with Whatman filter paper (grade 1, diameter 24.0 cm). The grids were  
472 washed with distilled water three times, followed by staining with 2 % uranyl acetate  
473 for 5 seconds. Grids were left to air dry and then imaged with a JEOL JEM-1400  
474 transmission electron microscope. Images were collected with a Gatan CCD OneView  
475 camera and analyzed using FIJI(Schindelin et al., 2012).

### 476 ***Ferroxidase activity assay***

477 The enzymatic activity of Empty-Enc and Loaded-Enc were assessed by  
478 ferroxidase assay, as previously described (Piergentili, 2020). Fe(II) samples were  
479 prepared by dissolving FeSO<sub>4</sub>·7H<sub>2</sub>O in HCl 0.1 % (v/v) under anaerobic conditions.  
480 Protein samples were diluted anaerobically in Buffer GF (20 mM HEPES, pH 8.0, 150  
481 mM NaCl) to a final encapsulin monomer concentration of 9 µM to allow comparison  
482 between experiments.

483 Iron and protein aliquots were added aerobically to a quartz cuvette (Hellma)  
484 resulting in a final concentration of 100 µM iron and 15 µM (Loaded-Enc), or 9 µM  
485 (Empty-Enc). The cuvette was placed in a UV-visible spectrophotometer (PerkinElmer  
486 Lambda 35) and the reaction sample was incubated at 21 °C for 50 s to stabilise.  
487 Absorbance at 315 nm was then recorded every second for 1450 s using the Time-  
488 Drive software. A control experiment was conducted by monitoring the background  
489 oxidation by atmospheric oxygen of 100 µM FeSO<sub>4</sub>·7H<sub>2</sub>O in the absence of the  
490 enzyme. Each experiment was carried out in three or more technical replicates, with  
491 replicate means and standard deviations calculated on the time zero-subtracted  
492 progress curves.

### 493 ***Liquid Chromatography Mass Spectrometry***

494 LC-MS experiments were performed on a Synapt G2 Q-ToF instrument (Waters  
495 Corp., Manchester, UK) and an Acquity UPLC equipped with a reverse phase C4 Aeris  
496 Widepore 50 × 2.1 mm HPLC column (Phenomenex, CA, USA). Mobile phases of; A=  
497 water + 0.1% formic acid, and B=acetonitrile + 0.1% formic acid were used on a ten-  
498  
499  
500

501 minute gradient from 5% B to 95% B. Samples were analysed at ~2  $\mu$ M, and data  
502 analysis was performed using MassLynx v4.1 and MaxEnt deconvolution.

503

## 504 ***Cryo-EM data collection and analysis***

### 505 *Sample vitrification*

506 Holey grids (gold, 200 mesh, r 2/2 by Quantifoil) were glow-discharged for 30  
507 seconds using a Pelco glow discharge system. The grids were then mounted into a  
508 FEI vitrobot and 4  $\mu$ L of encapsulin sample (3 mg/mL) was applied. Grids were then  
509 blotted (100% humidity, 8  $^{\circ}$ C, blot force -5, wait time 10 seconds and blot time of 3  
510 seconds) with Whatman filter paper (grade 1) and flash cooled in liquid ethane, cooled  
511 with liquid nitrogen.

512

### 513 *Cryo-EM data collection*

514 Cryo-EM grid screening was performed on a FEI F20 microscope equipped with  
515 a FEG electron source (200 kV) and a TVIPS F816 CMOS detector at the University  
516 of Edinburgh. The dataset used for single particle reconstruction was obtained at eBIC  
517 on a FEI Titan Krios microscope equipped with Gatan K3 camera (data collection  
518 settings are shown in **Table 4**). Alignments, grid transfer and imaging set up was  
519 performed by the eBIC local contact Dr Yun Song.

520

### 521 *Single particle reconstruction*

522 All processing steps were performed with the Relion 3.1 software package  
523 (Nakane et al., 2018). Super-resolution movies were binned (2  $\times$  2 pixels for I1  
524 reconstructions; 3  $\times$  3 for C1 reconstructions) and motion corrected using  
525 MotionCor2(Zheng et al., 2017). Defocus values of imaged (summed movies) were  
526 determined by CTFFIND4 (Rohou and Grigorieff, 2015) and those with poor CTF fits,  
527 or bad ice, were manually discarded. A template for autopicking was created using 2D  
528 classes from manually picked particles. Autopicked particles were extracted (using  
529 box sizes of 576 pixels (376  $\text{\AA}$ ) and 512 pixels (501  $\text{\AA}$ ) for icosahedral and C1  
530 processing respectively) and subjected to three rounds of 2D classification to remove  
531 bad particles. An initial 3D model was created from particles selected from 2D classes.  
532 3D classes were generated both with and without icosahedral symmetry imposed ('I1'  
533 and 'C1' symmetry). The best class from each was taken forward for 3D refinement  
534 and then CTF refinement followed by further rounds of 3D refinement and Bayesian  
535 polishing. After a final round of 3D refinement, postprocessing was performed using a  
536 soft spherical mask. Local resolution estimation was performed in Relion3.1. The data  
537 processing and refinement pipeline is shown in **Figure 2 - figure supplement 2** with  
538 data processing and refinement statistics in **Table 5**.

539 Motivated by the apparent flexibility of the 5-fold pores of the encapsulin shell,  
540 the 5-fold pore pentamer was subjected to symmetry expansion and focused  
541 classification. The I1 particle set was expanded using the sym\_expand job in Relion3.1  
542 and masked 3D classification without alignment was performed focused on the five-  
543 fold symmetry axis. Of the five classes produced the two most highly populated and  
544 distinct were taken forward for masked 3D refinement with local searches only, these  
545 two classes represent the 'open' and 'closed' conformation of the five-fold pore. The  
546 mask used in these steps was produced in Chimera using the molmap command from  
547 a docked model of a pentamer of the encapsulin protein. To ensure the box-size and  
548 pixel-size of the mask were correct, they were resampled onto the icosahedral map  
549 using the vop resample command.



550

### 551 *Model building and refinement*

552 An initial homology model of the encapsulin nanocompartment monomer was  
553 generated using Phyre 2.0(Kelly et al., 2015) based on the *T. maritima* structure. This  
554 was docked into the open and closed maps using ChimeraX(Pettersen et al., 2021)  
555 and expanded to a full pentamer model. The model was then fit to the map through an  
556 iterative process of automated model refinement with phenix real-space  
557 refinement(Afonine et al., 2018b) and manual model building in Coot(Emsley et al.,  
558 2010), waters were added using phenix.douse and validated in in Coot. The resulting  
559 models and maps were validated using Molprobity(Chen et al., 2010),  
560 phenix.mtriage(Afonine et al., 2018a), and EM ringer(Barad et al., 2015) (**Table 6**).  
561 Models and maps were visualized using ChimeraX.

562

### 563 *Encapsulin sequence analysis*

564 Encapsulin sequences were obtained from the Kyoto Encyclopedia of Genes  
565 and Genomes ([www.kegg.jp](http://www.kegg.jp)). Sequence alignments were performed using Clustal  
566 Omega(Sievers and Higgins, 2014) and visualized using ESPript(Gouet et al., 2003).

567

### 568 **Hydrogen/Deuterium Exchange Mass Spectrometry**

569 Hydrogen/deuterium exchange mass spectrometry (HDX-MS) was performed  
570 on a Synapt G2 MS system coupled to an ACQUITY UPLC M-Class UPLC with the  
571 HDX manager module (Waters Corporation, Manchester, UK)(Masson et al., 2019).  
572 For improved reliability and precision, a custom-built Leap automated platform was  
573 utilized in all sample preparation and injections. Prior to HDX-MS analysis, three  
574 buffer solutions were prepared – (i) equilibration buffer (4.7 mM K<sub>2</sub>HPO<sub>4</sub>, 0.3 mM  
575 KH<sub>2</sub>PO<sub>4</sub> in H<sub>2</sub>O), adjusted to pH 8.0 with formic acid; (ii) labelling buffer (4.7 mM  
576 K<sub>2</sub>HPO<sub>4</sub>, 0.3 mM KH<sub>2</sub>PO<sub>4</sub> in D<sub>2</sub>O), adjusted to pH 8.0 with DCl and quench buffer (50  
577 mM K<sub>2</sub>HPO<sub>4</sub>, 50 mM KH<sub>2</sub>PO<sub>4</sub> in H<sub>2</sub>O) adjusted to pH 2.3 with formic acid. Protein  
578 samples were diluted in equilibration buffer to final stock concentration of 42 mM. The  
579 time course experiments consisted of 7 timepoints: T0 (0 minute; undeuterated  
580 control), T1 (20 seconds), T2 (30 seconds), T3 (2 minutes), T4 (5 minutes) and T5 (30  
581 minutes) T6 (4 hours) and T7 (24 hours) with each timepoint being performed in  
582 triplicate. Sample preparation consisted of 5 µL protein solution, 57 µL equilibrium  
583 buffer (T0) or labelling buffer (T1-7). The final concentration of deuterium during the  
584 labelling step was 91.2 %. Exchange was allowed to proceed at 4 °C. To arrest the  
585 exchange reaction, 50 µL of quench buffer was added to this initial solution just prior  
586 to sample injection.

587 After injection, samples underwent proteolytic digestion on a 2.1 x 30 mm  
588 Waters Enzymate BEH pepsin column for 3 minutes at 200 µL/min. After digestion, the  
589 peptide digest was loaded on to a 2.1 x 5.0 mm Acquity BEH C18 VanGuard 1.7µm  
590 C18 Trapping column to pre-concentrate the sample for 3 minutes at 200 µL/min.  
591 Following trapping, the digests were separated through a 2.1 x 5.0 mm Acquity BEH  
592 1.7 µm analytical column prior to MS/MS (MS<sup>e</sup>) analysis via the Water Synapt G2 MS  
593 system running MassLynx v4.1 software (Waters Corporation, Manchester, UK). The  
594 separation gradient was 5-95 % acetonitrile with 0.1 % formic acid over 12 minutes at  
595 40 µL/min. Both the trapping and LC separation were performed at 1 °C to minimize  
596 back exchange. Post-processing was performed using Proteinlynx Global Server 3.0.3  
597 and Dynamx 3.0 software to determine the average deuterium uptake for each peptide  
598 at each time point. For comparative analyses, the relative fractional uptake was

599 determined by dividing the observed deuterium uptake by the number of available  
600 amide exchangers on each peptide.

601 Tables

602

603 **Table 1: Protein masses and assignments obtained by LC-MS**

604

| Sample     | Protein in Sample                   | Observed Average Mass (Da) | Assignment                      | Theoretical Average Mass (Da) |
|------------|-------------------------------------|----------------------------|---------------------------------|-------------------------------|
| Empty-Enc  | Encapsulin from <i>H. ochraceum</i> | 28969.67 ± 0.23            | Hoch-Enc monomer                | 28968.84*                     |
| Loaded-Enc | Encapsulin from <i>H. ochraceum</i> | 28813.24 ± 0.89            | Hoch-Enc monomer                | 28812.66*                     |
|            | EncFtn from <i>H. ochraceum</i>     | 14667.42 ± 0.22            | Hoch-EncFtn monomer without Met | 14668.20                      |
|            |                                     | 29334.50 ± 0.64            | Hoch-EncFtn dimer without Met   | 29336.40                      |

605

606

607 *The starting methionine residue is not always retained, and this has been indicated in "Assignment". Errors generated by MassLynx*

608 *v4.1.*

609 \* The difference in theoretical mass for the two *H. ochraceum* encapsulin proteins is due to an additional C-terminal arginine

610 residue in the Empty-Enc construct which is a cloning artefact from the MoClo kit used.

611

612

613  
614

**Table 2: gBlocks used in this study**

| Construct  | Sequence                                                                                                                                                                                                                                                                                                                                                                                                                                                                                                                                                                                                                                                                                                                                                                                                                                                                                                                              |
|------------|---------------------------------------------------------------------------------------------------------------------------------------------------------------------------------------------------------------------------------------------------------------------------------------------------------------------------------------------------------------------------------------------------------------------------------------------------------------------------------------------------------------------------------------------------------------------------------------------------------------------------------------------------------------------------------------------------------------------------------------------------------------------------------------------------------------------------------------------------------------------------------------------------------------------------------------|
| Empty-Enc  | <p>GGCGAAGACAT<b>AATG</b>GATCTGCTGAAACGTCATCTGGCACCGATTGTTCCGGATGCATGGTCAGCAATTGATGAAGAAGCCAAAGAAATTTTCA<br/> GGGCCATCTGGCAGGTCGTAAACTGGTTGATTTTCGTGGTCCGTTTGGTTGGGAATATGCAGCAGTTAATACCGGTGAACTGCGTCCGATTGATG<br/> ATACACCGGAAGATGTTGATATGAAACTGCGTCAGGTTTCAGCCGCTGGCCGAAGTTCGTGTGCCGTTTACCTGGATGTTACCGAACTGGATAGC<br/> GTTGCACGTGGTGAACCAATCCGGATCTGGATGATGTTGCCCGTGCAGCAGAACGTATGGTTGAAGCAGAAGATAGCGCAATTTTTCATGGTTG<br/> GGCACAGGCAGGTATTAAGGTATTGTTGATAGCACACCGCATGAAGCACTGGCAGTTGCAAGCGTTAGCGATTTCCGCGTGCAGTTCTGAGCG<br/> CAGCAGATACACTGCGTAAAGCCGGTGTACCAGTCCGTATGCACTGGTTCTGGGTCCGAAAGCCTATGATGACCTGTTTGCAGCAACCCAGGAT<br/> GGTTATCCGGTTGCAAAACAGGTGCAGCGTCTGGTTGTTGATGGTCCGCTGGTTCGTGCAATGCCCTGGCAGGCGCACTGGTTATGAGCATGCG<br/> TGGTGGTGATTATGAACTGACCGTTGGTCAGGATCTGAGCATTGGTTATGCATTTTCATGATCGTAGCAAAGTGGAACTGTTTGTGGCAGAAAGTT<br/> TTACCTTTCGTGTTCTGGAACCGGGTGCAGCCGTTTCATCTGCGTTATGCATAA<b>AGGT</b>AT<u>GTCTTCCGTC</u></p> |
| Loaded-Enc | Encapsulin: as above                                                                                                                                                                                                                                                                                                                                                                                                                                                                                                                                                                                                                                                                                                                                                                                                                                                                                                                  |
|            | <p>EncFtn:<br/> GGCGAAGACAT<b>AATG</b>AGCAGCGAACAGCTGCATGAACCGGCAGAAGTCTGAGCGAAGAAACCAAAAACATGCATCGTGCCTGGTTACCCTGATTGAAG<br/> AACTGGAAGCAGTTGATTGGTATCAGCAGCGTGCAGATGCCTGTAGCGAACCGGGTCTGCATGATGTTCTGATTTCATAACAAAAACGAAGAGGTGGAACA<br/> TGCAATGATGACCCTGGAATGGATTCGTCGTCGTAGTCCGGTTTTTGGATGCACACATGCGTACCTACCTGTTTACCGAACGTCGATTCTGGAATTAGAA<br/> GAAGAAGATAACCGGTAGCAGCAGCAGCGTTGCGGCAAGCCCACCAGCGCACCGAGTCATGGTAGCTTAGGTATTGGTAGCCTGCGTCAAGAAGGTAAAG<br/> AAGATTAA<b>AGGT</b>AT<u>GTCTTCCGG</u></p>                                                                                                                                                                                                                                                                                                                                                                                                                               |

615  
616

BbsI restriction enzyme recognition sites are underlined, and overhang sequences are shown in bold.

617 **Table 3: Protein constructs used in this study.**

618

| Protein Construct | Protein                                           | Sequence                                                                                                                                                                                                                                                                                                           | Amino acids | Average Molecular weight (Da) | pI   | Extinction coefficient ( $M^{-1} cm^{-1}$ ) |
|-------------------|---------------------------------------------------|--------------------------------------------------------------------------------------------------------------------------------------------------------------------------------------------------------------------------------------------------------------------------------------------------------------------|-------------|-------------------------------|------|---------------------------------------------|
| Empty-Enc         | Encapsulin shell protein from <i>H. ochraceum</i> | MDLLKRHLAPIVPDAWSAIDEEAKEIFQGHLAGRKLVDFRG<br>PFGWEYAAVNTGELRPIDDTPEDVDMKLRQVQPLAEVRVPF<br>TLDVTELDVARGATNPDLDDVARAAERMVEAEDSAIFHGW<br>AQAGIKGIVDSTPHEALAVASVDFPRAVLSAADTLRKAGV<br>TGPYALVLGPKAYDDLFAATQDGYPVAKQVQRLVVDGPLVR<br>ANALAGALVMSMRGGDYELTVGQDLSIGYAFHDRSKVELFV<br><u>AESFTFRVLEPGA</u> AVHLRY <b>A</b> R | 267         | 28968.84                      | 4.88 | 26930                                       |
| Loaded-Enc        | Encapsulin shell protein from <i>H. ochraceum</i> | MDLLKRHLAPIVPDAWSAIDEEAKEIFQGHLAGRKLVDFRG<br>PFGWEYAAVNTGELRPIDDTPEDVDMKLRQVQPLAEVRVPF<br>TLDVTELDVARGATNPDLDDVARAAERMVEAEDSAIFHGW<br>AQAGIKGIVDSTPHEALAVASVDFPRAVLSAADTLRKAGV<br>TGPYALVLGPKAYDDLFAATQDGYPVAKQVQRLVVDGPLVR<br>ANALAGALVMSMRGGDYELTVGQDLSIGYAFHDRSKVELFV<br><u>AESFTFRVLEPGA</u> AVHLRYA           | 266         | 28812.66                      | 4.82 | 26930                                       |
|                   | Encapsulated ferritin from <i>H. ochraceum</i>    | MSSEQLHEPAELLSEETKNMHRALVTLIEELEAVDWYQQRA<br>DACSEPLHDVLIHNKNEEVEHAMMTLEWIRRRSPVFDAM<br>RTYLFTERPILELEEDTGSSSSVAASPTSAPSHGSLGIGS<br>LRQEGKED                                                                                                                                                                       | 131         | 14799.39                      | 4.70 | 13980                                       |

619 The additional Arg residue (bold, underlined) in the Hoch-Enc construct is a cloning artefact from the MoClo kit used.

620

621 **Table 4: Autoinduction media components**

622

| <b>Media Reagents</b>                              | <b>Concentration</b> |
|----------------------------------------------------|----------------------|
| Tryptone                                           | 1 % (w/v)            |
| Yeast Extract                                      | 0.5 % (w/v)          |
| Glycerol                                           | 0.5 % (v/v)          |
| Glucose                                            | 0.05 % (w/v)         |
| $\alpha$ -D-lactose                                | 0.2 % (w/v)          |
| $(\text{NH}_4)_2\text{SO}_4$                       | 25 mM                |
| $\text{KH}_2\text{PO}_4$                           | 50 mM                |
| $\text{Na}_2\text{PO}_4 \cdot 7\text{H}_2\text{O}$ | 50 mM                |
| Magnesium Sulfate                                  | 2 mM                 |

623



624 **Table 5: Cryo-EM data collection and processing**

625

|                                           | <b>Loaded-Enc<br/>Icosahedral<br/>Reconstruction</b>     | <b>Loaded-Enc<br/>C1 Reconstruction</b> |
|-------------------------------------------|----------------------------------------------------------|-----------------------------------------|
| <b>Data Collection</b>                    |                                                          |                                         |
| Microscope                                | FEI Titan Krios (300 kV)                                 |                                         |
| Detector                                  | Gatan K3                                                 |                                         |
| Acquisition Mode                          | Super resolution                                         |                                         |
| Pixel Size                                | 0.326 Å/pix (super-resolution)<br>0.652 Å/pix (physical) |                                         |
| Total dose                                | 40.509 e <sup>-</sup> /Å <sup>2</sup>                    |                                         |
| Fractional dose                           | 40 frames during a 1 s exposure                          |                                         |
| Defocus range                             | 0.7 – 2.5 µm (0.3 µm steps)                              |                                         |
| Micrograph ‘movies’ recorded              | 8109                                                     |                                         |
| Movies DOI                                | TBC                                                      |                                         |
| <b>Reconstruction</b>                     |                                                          |                                         |
| Alignment Software                        | MotionCor2                                               |                                         |
| Dose weighting                            | yes                                                      |                                         |
| CTF fitting software                      | CTFFIND4                                                 |                                         |
| Correction                                | full                                                     |                                         |
| Particle picking method/software          | Relion – templated from manual picked 2D classes         |                                         |
| Particles picked                          | 340,403                                                  | 309,404                                 |
| Particles in 2D classes                   | 304,741                                                  | 287,914                                 |
| Particles used in final 3D reconstruction | 254,134                                                  | 117,879                                 |
| Alignment software                        | Relion                                                   | Relion                                  |
| Reconstruction software                   | Relion                                                   | Relion                                  |
| Box size                                  | 576 pixels<br>(376 Å)                                    | 512 pixels<br>(501 Å)                   |
| Voxel size (Å)                            | 0.652                                                    | 0.978                                   |
| Symmetry                                  | I1                                                       | C1                                      |
| Map resolution (GS-FSC 0.143) (Å)         | 2.4                                                      | 3.1                                     |
| Sharpening B-factor (Å <sup>2</sup> )     | -97                                                      | -66                                     |
| EMDB ID                                   | tbc                                                      | tbc                                     |

626

627

628  
629  
630  
631

**Table 6: Model building and refinement of the ‘open’ and ‘closed’ pentamer conformations of the encapsulin nanocompartment.**

| <b>Symmetry expansion of I1 dataset</b>   |                            |                          |
|-------------------------------------------|----------------------------|--------------------------|
|                                           | <b>Closed Enc pentamer</b> | <b>Open Enc pentamer</b> |
| <b>Reconstruction</b>                     |                            |                          |
| Number of asymmetric units in final model | 4,734,551                  | 4,987,966                |
| Map resolution (GS-FSC 0.143) (Å)         | 2.3                        | 2.4                      |
| Map Sharpening B-factor (Å <sup>2</sup> ) | -93                        | -117                     |
| <b>Coordinate refinement</b>              |                            |                          |
| Software                                  | Phenix                     | Phenix                   |
| Refinement algorithm                      | Real space                 | Real space               |
| Resolution cutoff (Å)                     | 2.3                        | 2.4                      |
| FSC <sub>model-vs-map</sub> = 0.5 (Å)     | 2.4                        | 2.5                      |
| <b>Model</b>                              |                            |                          |
| Number of amino acid residues             | 1375                       | 1375                     |
| Bond length outliers                      | 0                          | 0                        |
| Bond angle outliers                       | 0                          | 0                        |
| RMS deviations                            |                            |                          |
| Bonds (Å)                                 | 0.006                      | 0.004                    |
| Angles (°)                                | 0.699                      | 0.632                    |
| <b>Validation</b>                         |                            |                          |
| Molprobit score                           | 1.25                       | 1.64                     |
| Clash score                               | 2.88                       | 7.83                     |
| Rotamer outliers (%)                      | 2.2                        | 0                        |
| C <sub>β</sub> outliers (%)               | 0                          | 0                        |
| CaBLAM outliers (%)                       | 1.1                        | 1.5                      |
| Ramachandran (%)                          |                            |                          |
| Favoured                                  | 97.05                      | 96.68                    |
| Outlier                                   | 2.95                       | 3.32                     |
| Model vs Data CC (mask)                   | 0.89                       | 0.78                     |
| EM Ringer score                           | 5.66                       | 4.88                     |
| PDB ID                                    | tbc                        | tbc                      |

632

633 **Table 7: Recorded uptake of deuterium for each peptide and timepoint observed in HDX-MS of Loaded-Enc.** For each peptic  
634 peptide observed in the HDX-MS analysis, the deuterium uptake (in Da) and standard deviation (SD) of triplicate data is shown for  
635 each timepoint (10 s, 30 s, 2 mins, 5 mins, 4 hours and 24 hours) for each peptide. The number of exchangeable backbone amide  
636 hydrogens is also stated (exchangers).  
637

| Sequence             | Exchangers | Loaded-Enc deuterium uptake (Da) |     |      |        |      |        |        |           |        |           |         |            |       |          |        |           |
|----------------------|------------|----------------------------------|-----|------|--------|------|--------|--------|-----------|--------|-----------|---------|------------|-------|----------|--------|-----------|
|                      |            | Start                            | End | 10s  | 10s SD | 30s  | 30s SD | 2 mins | 2 mins SD | 5 mins | 5 mins SD | 30 mins | 30 mins SD | 4 hrs | 4 hrs SD | 24 hrs | 24 hrs SD |
| LKRHLAPIVPDAW        | 10         | 3                                | 15  | 0.34 | 0.08   | 0.31 | 0.10   | 0.36   | 0.29      | 0.36   | 0.15      | 0.38    | 0.08       | 0.55  | 0.08     | NaN    | NaN       |
| LKRHLAPIVPDAWSA      | 12         | 3                                | 17  | 0.45 | 0.06   | 0.39 | 0.08   | 0.36   | 0.09      | 0.41   | 0.06      | 0.56    | 0.11       | 0.89  | 0.05     | NaN    | NaN       |
| EAKEIFQGHLAGRKLVD    | 16         | 21                               | 37  | 0.62 | 0.06   | 0.55 | 0.10   | 0.59   | 0.10      | 0.65   | 0.08      | 0.90    | 0.14       | 1.66  | 0.06     | 1.42   | 0.19      |
| EAKEIFQGHLAGRKLVDVDF | 17         | 21                               | 38  | 0.62 | 0.03   | 0.56 | 0.06   | 0.62   | 0.06      | 0.79   | 0.05      | 1.08    | 0.22       | 1.90  | 0.03     | 1.52   | 0.16      |
| IFQGHLAGRKLVD        | 12         | 25                               | 37  | 0.34 | 0.08   | 0.32 | 0.08   | 0.31   | 0.11      | 0.39   | 0.09      | 0.43    | 0.09       | 0.95  | 0.13     | 0.69   | 0.13      |
| IFQGHLAGRKLVDVDF     | 13         | 25                               | 38  | 0.40 | 0.05   | 0.38 | 0.05   | 0.44   | 0.06      | 0.61   | 0.08      | 0.79    | 0.20       | 1.58  | 0.10     | NaN    | NaN       |
| FRGPFQWEY            | 7          | 38                               | 46  | 0.82 | 0.06   | 0.70 | 0.28   | 0.93   | 0.10      | 0.97   | 0.15      | 1.45    | 0.29       | 2.30  | 0.07     | 1.89   | 0.03      |
| YAAVNTGELRPIDDPED    | 15         | 46                               | 63  | 1.83 | 0.13   | 1.72 | 0.44   | 2.32   | 0.18      | 2.54   | 0.10      | 3.11    | 0.57       | 5.13  | 1.70     | 4.05   | 0.34      |
| YAAVNTGELRPIDDPEDVD  | 17         | 46                               | 65  | 1.92 | 0.11   | 1.89 | 0.45   | 2.53   | 0.15      | 2.75   | 0.15      | 3.37    | 0.66       | 5.40  | 0.20     | 4.52   | 0.50      |
| AAVNTGELRPIDDPED     | 14         | 47                               | 63  | 1.81 | 0.05   | 1.66 | 0.45   | 2.41   | 0.13      | 2.54   | 0.14      | 3.04    | 0.47       | 4.63  | 0.18     | 3.68   | 0.27      |
| LRPIDDPED            | 7          | 54                               | 63  | 0.97 | 0.08   | 0.97 | 0.29   | 1.20   | 0.15      | 1.29   | 0.05      | 1.70    | 0.29       | 2.48  | 0.11     | 1.94   | 0.08      |
| LRPIDDPEDVD          | 9          | 54                               | 65  | 1.13 | 0.12   | 0.99 | 0.31   | 1.35   | 0.18      | 1.53   | 0.14      | 1.83    | 0.28       | 2.87  | 0.12     | 2.59   | 0.24      |
| MKLRQVQPLAE          | 9          | 66                               | 76  | 0.82 | 0.12   | 0.73 | 0.23   | 0.67   | 0.15      | 0.75   | 0.23      | 1.01    | 0.14       | 1.29  | 0.08     | 1.17   | 0.23      |
| KLRQVQPLAE           | 8          | 67                               | 76  | 0.88 | 0.09   | 0.78 | 0.20   | 0.81   | 0.12      | 0.87   | 0.09      | 1.01    | 0.12       | 1.28  | 0.06     | 1.00   | 0.15      |
| RQVQPLAE             | 6          | 69                               | 76  | 0.69 | 0.11   | 0.64 | 0.18   | 0.71   | 0.11      | 0.63   | 0.14      | 0.85    | 0.10       | 1.07  | 0.05     | 0.88   | 0.09      |
| VRVPFTL              | 5          | 77                               | 83  | 0.12 | 0.04   | 0.13 | 0.04   | 0.06   | 0.08      | 0.09   | 0.08      | 0.15    | 0.05       | 0.24  | 0.03     | NaN    | NaN       |
| VRVPFTLD             | 6          | 77                               | 84  | 0.26 | 0.03   | 0.29 | 0.04   | 0.27   | 0.06      | 0.33   | 0.04      | 0.40    | 0.08       | 0.64  | 0.03     | 0.59   | 0.10      |
| LDSVARGATNPDLDD      | 13         | 88                               | 102 | 1.50 | 0.14   | 1.21 | 0.28   | 1.36   | 0.20      | 1.79   | 0.06      | 2.04    | 0.38       | 3.43  | 0.15     | NaN    | NaN       |
| DSVARGATNPDL         | 10         | 89                               | 100 | 1.25 | 0.04   | 1.12 | 0.12   | 1.25   | 0.07      | 1.39   | 0.10      | 1.69    | 0.29       | 3.12  | 0.17     | 2.27   | 0.23      |
| DSVARGATNPDLDD       | 12         | 89                               | 102 | 1.52 | 0.03   | 1.45 | 0.18   | 1.60   | 0.12      | 1.72   | 0.03      | 2.05    | 0.32       | 3.34  | 0.13     | 2.42   | 0.29      |
| AEDSAIFHG            | 8          | 113                              | 121 | 0.15 | 0.05   | 0.14 | 0.09   | 0.05   | 0.07      | 0.14   | 0.10      | 0.16    | 0.05       | 0.17  | 0.05     | -0.02  | 0.04      |
| HGWAQAGIKGIVDSTPHEAL | 18         | 120                              | 139 | 2.27 | 0.08   | 2.15 | 0.51   | 2.54   | 0.23      | 2.84   | 0.10      | 3.25    | 0.41       | 6.04  | 0.09     | 5.14   | 0.58      |
| WAQAGIKGIVDSTPHEAL   | 16         | 122                              | 139 | 1.70 | 0.05   | 1.63 | 0.33   | 2.01   | 0.14      | 2.22   | 0.08      | 2.56    | 0.40       | 4.91  | 0.11     | 4.20   | 0.32      |
| IVDSTPHEAL           | 8          | 130                              | 139 | 0.68 | 0.07   | 0.72 | 0.12   | 0.86   | 0.08      | 0.97   | 0.04      | 1.07    | 0.19       | 2.39  | 0.12     | 1.85   | 0.21      |
| AVASVSDFPRAVL        | 11         | 140                              | 152 | 1.40 | 0.06   | 1.30 | 0.37   | 1.69   | 0.13      | 1.84   | 0.06      | 1.98    | 0.26       | 3.08  | 0.10     | 2.31   | 0.28      |

|                   |    |     |     |      |      |      |      |      |      |      |      |      |      |      |      |      |      |
|-------------------|----|-----|-----|------|------|------|------|------|------|------|------|------|------|------|------|------|------|
| SAADTLRKAGVTGPYA  | 14 | 153 | 168 | 0.89 | 0.04 | 0.85 | 0.15 | 1.07 | 0.09 | 1.29 | 0.13 | 1.86 | 0.37 | 2.89 | 0.06 | 2.92 | 0.27 |
| SAADTLRKAGVTGPYAL | 15 | 153 | 169 | 0.85 | 0.07 | 0.82 | 0.14 | 1.08 | 0.09 | 1.25 | 0.08 | 1.75 | 0.44 | 2.85 | 0.08 | 2.92 | 0.28 |
| LVLGPKAYDDL       | 9  | 169 | 179 | 0.47 | 0.06 | 0.44 | 0.11 | 0.59 | 0.08 | 0.62 | 0.05 | 0.75 | 0.10 | 1.27 | 0.06 | 1.04 | 0.15 |
| FAATQDGYPAKQVQRL  | 15 | 180 | 196 | 3.03 | 0.10 | 3.28 | 0.17 | 3.86 | 0.19 | 4.31 | 0.18 | 5.28 | 0.92 | 8.30 | 0.33 | 6.92 | 0.53 |
| VVDGPLVRA         | 7  | 197 | 205 | 0.62 | 0.07 | 0.63 | 0.17 | 1.08 | 0.07 | 1.26 | 0.12 | 1.58 | 0.30 | 1.96 | 0.07 | 2.00 | 0.18 |
| VVDGPLVRANA       | 9  | 197 | 207 | 1.08 | 0.06 | 1.20 | 0.13 | 1.70 | 0.09 | 2.02 | 0.08 | 2.59 | 0.18 | 3.26 | 0.10 | 2.84 | 0.19 |
| VVDGPLVRANAL      | 10 | 197 | 208 | 1.09 | 0.04 | 1.02 | 0.28 | 1.83 | 0.18 | 2.01 | 0.19 | 2.75 | 0.21 | 3.84 | 0.10 | 3.53 | 0.31 |
| VVDGPLVRANALAGA   | 13 | 197 | 211 | 1.58 | 0.06 | 1.45 | 0.44 | 2.50 | 0.27 | 2.86 | 0.09 | 3.76 | 0.32 | 5.20 | 0.15 | 5.17 | 0.29 |
| VVDGPLVRANALAGAL  | 14 | 197 | 212 | 1.56 | 0.08 | 1.55 | 0.39 | 2.52 | 0.19 | 2.89 | 0.08 | 3.36 | 0.59 | 5.28 | 0.17 | 5.13 | 0.49 |
| NALAGAL           | 6  | 206 | 212 | 0.46 | 0.05 | 0.50 | 0.14 | 0.70 | 0.09 | 0.77 | 0.06 | 1.10 | 0.18 | 1.92 | 0.07 | 2.14 | 0.07 |
| LSIGYAFHDRSKVEL   | 14 | 229 | 243 | 0.28 | 0.13 | 0.31 | 0.13 | 0.38 | 0.15 | 0.34 | 0.16 | 0.93 | 0.23 | 1.85 | 0.12 | 1.59 | 0.19 |
| YAFHDRSKVEL       | 10 | 233 | 243 | 0.48 | 0.07 | 0.41 | 0.11 | 0.39 | 0.11 | 0.42 | 0.20 | 0.75 | 0.12 | 1.18 | 0.29 | 0.95 | 0.30 |
| FVAESFT           | 6  | 244 | 250 | 0.16 | 0.02 | 0.27 | 0.75 | 0.13 | 0.03 | 0.12 | 0.04 | 0.18 | 0.03 | 0.12 | 0.02 | NaN  | NaN  |
| FRVLEPGAA         | 7  | 251 | 259 | 0.32 | 0.06 | 0.33 | 0.06 | 0.44 | 0.07 | 0.57 | 0.08 | 0.88 | 0.28 | 1.45 | 0.05 | 1.09 | 0.11 |

638

639

640  
641  
642  
643  
644  
645

**Table 8: Deuterium uptake for each peptide and timepoint observed in HDX-MS of Empty-Enc.**

The deuterium uptake (in Da) is shown for each timepoint (10 s, 30 s, 2 mins, 5 mins, 4 hours and 24 hours) for each peptic peptide from Empty-Enc observed in HDX-MS. HDX-MS experiments were performed in triplicate and the standard deviation (SD) is shown for each time point. The number of exchangeable backbone amide hydrogens in each peptide is also shown (exchangers).

| Sequence             | Exchangers | Empty-Enc deuterium uptake (Da) |     |      |        |      |        |        |           |        |           |         |            |       |          |        |           |
|----------------------|------------|---------------------------------|-----|------|--------|------|--------|--------|-----------|--------|-----------|---------|------------|-------|----------|--------|-----------|
|                      |            | Start                           | End | 10s  | 10s SD | 30s  | 30s SD | 2 mins | 2 mins SD | 5 mins | 5 mins SD | 30 mins | 30 mins SD | 4 hrs | 4 hrs SD | 24 hrs | 24 hrs SD |
| LKRHLAPIVPDAW        | 10         | 3                               | 15  | 0.34 | 0.05   | 0.35 | 0.02   | 0.38   | 0.02      | 0.40   | 0.03      | 0.40    | 0.07       | 1.36  | 0.23     | 1.48   | 0.03      |
| LKRHLAPIVPDAWSA      | 12         | 3                               | 17  | 0.40 | 0.05   | 0.42 | 0.04   | 0.47   | 0.05      | 0.55   | 0.10      | 0.56    | 0.15       | 2.25  | 0.33     | 2.57   | 0.06      |
| EAKEIFQGHLAGRKLVD    | 16         | 21                              | 37  | 0.71 | 0.08   | 0.75 | 0.05   | 0.85   | 0.02      | 0.98   | 0.03      | 1.10    | 0.18       | 3.53  | 0.24     | 3.31   | 0.06      |
| EAKEIFQGHLAGRKLVDF   | 17         | 21                              | 38  | 0.65 | 0.05   | 0.68 | 0.04   | 0.84   | 0.01      | 1.07   | 0.04      | 1.21    | 0.25       | 3.58  | 0.20     | 3.29   | 0.06      |
| IFQGHLAGRKLVD        | 12         | 25                              | 37  | 0.37 | 0.04   | 0.40 | 0.03   | 0.43   | 0.03      | 0.47   | 0.09      | 0.55    | 0.09       | 1.81  | 0.28     | 1.60   | 0.06      |
| IFQGHLAGRKLVDF       | 13         | 25                              | 38  | 0.46 | 0.04   | 0.49 | 0.04   | 0.60   | 0.03      | 0.77   | 0.07      | 0.93    | 0.19       | 2.20  | 0.19     | 2.05   | 0.06      |
| FRGPFGWY             | 7          | 38                              | 46  | 0.92 | 0.08   | 0.99 | 0.03   | 1.14   | 0.03      | 1.23   | 0.08      | 1.61    | 0.07       | 2.90  | 0.17     | 3.01   | 0.03      |
| YAAVNTGELRPIDDTPED   | 15         | 46                              | 63  | 1.96 | 0.15   | 2.15 | 0.11   | 2.63   | 0.08      | 2.93   | 0.10      | 3.45    | 0.51       | 5.76  | 0.20     | 5.71   | 0.17      |
| YAAVNTGELRPIDDTPEDVD | 17         | 46                              | 65  | 2.07 | 0.12   | 2.24 | 0.10   | 2.76   | 0.10      | 3.12   | 0.12      | 3.51    | 0.53       | 6.70  | 0.22     | 6.61   | 0.15      |
| AAVNTGELRPIDDTPED    | 14         | 47                              | 63  | 1.90 | 0.12   | 2.14 | 0.07   | 2.60   | 0.04      | 2.94   | 0.10      | 3.25    | 0.44       | 5.25  | 0.18     | 5.18   | 0.17      |
| LRPIDDTPED           | 7          | 54                              | 63  | 1.07 | 0.05   | 1.22 | 0.01   | 1.41   | 0.04      | 1.54   | 0.09      | 1.65    | 0.25       | 2.42  | 0.14     | 2.36   | 0.03      |
| LRPIDDTPEDVD         | 9          | 54                              | 65  | 1.14 | 0.07   | 1.23 | 0.06   | 1.44   | 0.02      | 1.69   | 0.09      | 1.79    | 0.40       | 3.25  | 0.07     | 3.24   | 0.06      |
| MKLRQVQPLAE          | 9          | 66                              | 76  | 0.82 | 0.11   | 0.86 | 0.05   | 0.90   | 0.05      | 0.77   | 0.12      | 0.76    | 0.09       | 1.62  | 0.16     | 1.56   | 0.08      |
| KLRQVQPLAE           | 8          | 67                              | 76  | 0.79 | 0.08   | 0.84 | 0.06   | 0.88   | 0.07      | 0.85   | 0.08      | 0.88    | 0.10       | 1.60  | 0.20     | 1.48   | 0.08      |
| RQVQPLAE             | 6          | 69                              | 76  | 0.64 | 0.08   | 0.69 | 0.05   | 0.75   | 0.06      | 0.71   | 0.06      | 0.70    | 0.08       | 1.20  | 0.13     | 1.12   | 0.06      |
| VRVPFTL              | 5          | 77                              | 83  | 0.10 | 0.03   | 0.11 | 0.03   | 0.11   | 0.04      | 0.11   | 0.06      | 0.09    | 0.07       | 0.63  | 0.12     | 0.70   | 0.03      |
| VRVPFTLD             | 6          | 77                              | 84  | 0.24 | 0.03   | 0.24 | 0.02   | 0.30   | 0.02      | 0.35   | 0.04      | 0.42    | 0.09       | 1.01  | 0.08     | 1.04   | 0.03      |
| LDSVARGATNPDLDD      | 13         | 88                              | 102 | 1.37 | 0.16   | 1.48 | 0.11   | 1.64   | 0.08      | 1.55   | 0.21      | 1.61    | 0.49       | 3.68  | 0.29     | 3.53   | 0.14      |
| DSVARGATNPDL         | 10         | 89                              | 100 | 1.27 | 0.07   | 1.33 | 0.03   | 1.52   | 0.04      | 1.54   | 0.06      | 1.61    | 0.33       | 3.24  | 0.08     | 3.15   | 0.08      |
| DSVARGATNPDLDD       | 12         | 89                              | 102 | 1.48 | 0.12   | 1.59 | 0.04   | 1.80   | 0.02      | 1.95   | 0.08      | 2.13    | 0.27       | 3.82  | 0.16     | 3.61   | 0.12      |
| AEDSAIFHG            | 8          | 113                             | 121 | 0.12 | 0.04   | 0.13 | 0.05   | 0.12   | 0.04      | 0.11   | 0.08      | 0.09    | 0.08       | 0.18  | 0.11     | 0.13   | 0.03      |
| HGWAQAGIKGIVDSTPHEAL | 18         | 120                             | 139 | 2.36 | 0.19   | 2.51 | 0.07   | 2.86   | 0.07      | 3.07   | 0.13      | 3.39    | 0.40       | 6.66  | 0.14     | 6.57   | 0.19      |
| WAQAGIKGIVDSTPHEAL   | 16         | 122                             | 139 | 1.76 | 0.18   | 1.89 | 0.14   | 2.19   | 0.14      | 2.44   | 0.15      | 2.74    | 0.42       | 5.65  | 0.19     | 5.45   | 0.19      |
| IVDSTPHEAL           | 8          | 130                             | 139 | 0.72 | 0.08   | 0.80 | 0.08   | 0.93   | 0.09      | 1.02   | 0.04      | 1.08    | 0.12       | 2.65  | 0.17     | 2.59   | 0.07      |

|                   |    |     |     |      |      |      |      |      |      |      |      |      |      |      |      |      |      |
|-------------------|----|-----|-----|------|------|------|------|------|------|------|------|------|------|------|------|------|------|
| AVASVSDFPRAVL     | 11 | 140 | 152 | 1.52 | 0.08 | 1.66 | 0.04 | 1.94 | 0.05 | 2.09 | 0.04 | 2.19 | 0.19 | 3.42 | 0.11 | 3.38 | 0.10 |
| SAADTLRKAGVTGPYA  | 14 | 153 | 168 | 0.93 | 0.07 | 1.05 | 0.05 | 1.32 | 0.04 | 1.53 | 0.06 | 1.71 | 0.31 | 3.39 | 0.10 | 3.37 | 0.06 |
| SAADTLRKAGVTGPYAL | 15 | 153 | 169 | 0.89 | 0.07 | 1.00 | 0.05 | 1.26 | 0.03 | 1.51 | 0.05 | 1.72 | 0.28 | 3.48 | 0.11 | 3.43 | 0.06 |
| LVLGPKAYDDL       | 9  | 169 | 179 | 0.58 | 0.05 | 0.60 | 0.04 | 0.69 | 0.03 | 0.80 | 0.05 | 0.88 | 0.18 | 1.97 | 0.09 | 1.98 | 0.05 |
| FAATQDGYPVAKQVQRL | 15 | 180 | 196 | 3.62 | 0.16 | 3.96 | 0.19 | 4.97 | 0.10 | 5.40 | 0.04 | 6.34 | 0.09 | 8.32 | 0.12 | 8.39 | 0.10 |
| VVDGPLVRA         | 7  | 197 | 205 | 0.80 | 0.06 | 0.93 | 0.06 | 1.39 | 0.06 | 1.68 | 0.04 | 1.83 | 0.21 | 2.58 | 0.15 | 2.70 | 0.06 |
| VVDGPLVRANA       | 9  | 197 | 207 | 1.27 | 0.07 | 1.53 | 0.08 | 2.15 | 0.08 | 2.44 | 0.04 | 2.85 | 0.07 | 3.86 | 0.10 | 3.88 | 0.07 |
| VVDGPLVRANAL      | 10 | 197 | 208 | 1.28 | 0.09 | 1.51 | 0.09 | 2.16 | 0.10 | 2.62 | 0.07 | 3.22 | 0.06 | 4.59 | 0.11 | 4.55 | 0.12 |
| VVDGPLVRANALAGA   | 13 | 197 | 211 | 2.03 | 0.09 | 2.37 | 0.08 | 3.15 | 0.09 | 3.59 | 0.20 | 4.06 | 0.52 | 6.15 | 0.20 | 6.24 | 0.13 |
| VVDGPLVRANALAGAL  | 14 | 197 | 212 | 2.08 | 0.10 | 2.41 | 0.10 | 3.24 | 0.06 | 3.58 | 0.10 | 4.26 | 0.10 | 6.39 | 0.18 | 6.41 | 0.16 |
| NALAGAL           | 6  | 206 | 212 | 0.72 | 0.04 | 0.81 | 0.04 | 0.93 | 0.04 | 1.02 | 0.04 | 1.26 | 0.25 | 2.28 | 0.11 | 2.34 | 0.09 |
| LSIGYAFHDRSKVEL   | 14 | 229 | 243 | 0.53 | 0.05 | 0.64 | 0.06 | 0.86 | 0.07 | 0.87 | 0.10 | 0.89 | 0.14 | 1.90 | 0.23 | 1.55 | 0.08 |
| YAFHDRSKVEL       | 10 | 233 | 243 | 0.44 | 0.05 | 0.51 | 0.05 | 0.56 | 0.05 | 0.62 | 0.06 | 0.68 | 0.11 | 1.16 | 0.26 | 0.93 | 0.07 |
| FVAESFT           | 6  | 244 | 250 | 0.09 | 0.01 | 0.09 | 0.01 | 0.10 | 0.01 | 0.11 | 0.03 | 0.07 | 0.02 | 0.12 | 0.03 | 0.10 | 0.01 |
| FRVLEPGAA         | 7  | 251 | 259 | 0.29 | 0.03 | 0.38 | 0.55 | 0.50 | 0.03 | 0.72 | 0.04 | 0.89 | 0.20 | 1.46 | 0.10 | 1.36 | 0.03 |

646  
647  
648  
649  
650  
651  
652  
653  
654



## 655 References

- 656 Afonine P V., Klaholz BP, Moriarty NW, Poon BK, Sobolev O V., Terwilliger TC,  
657 Adams PD, Urzhumtsev A, IUCr. 2018a. New tools for the analysis and  
658 validation of cryo-EM maps and atomic models. *Acta Crystallogr Sect D Struct*  
659 *Biol* **74**:814–840. doi:10.1107/S2059798318009324
- 660 Afonine P V., Poon BK, Read RJ, Sobolev O V., Terwilliger TC, Urzhumtsev A,  
661 Adams PD. 2018b. Real-space refinement in PHENIX for cryo-EM and  
662 crystallography. *Acta Crystallogr Sect D Struct Biol* **74**:531–544.  
663 doi:10.1107/S2059798318006551
- 664 Akita F, Chong KT, Tanaka H, Yamashita E, Miyazaki N, Nakaishi Y, Suzuki M,  
665 Namba K, Ono Y, Tsukihara T, Nakagawa A. 2007. The crystal structure of a  
666 virus-like particle from the hyperthermophilic archaeon *Pyrococcus furiosus*  
667 provides insight into the evolution of viruses. *J Mol Biol* **368**:1469–83.  
668 doi:10.1016/j.jmb.2007.02.075
- 669 Andrews SC. 2010. The Ferritin-like superfamily: Evolution of the biological iron  
670 storeman from a rubrerythrin-like ancestor. *Biochim Biophys Acta* **1800**:691–  
671 705. doi:10.1016/j.bbagen.2010.05.010
- 672 Barad BA, Echols N, Wang RY-R, Cheng Y, DiMaio F, Adams PD, Fraser JS. 2015.  
673 EMRinger: side chain-directed model and map validation for 3D cryo-electron  
674 microscopy. *Nat Methods* **12**:943–6. doi:10.1038/nmeth.3541
- 675 Chen VB, Arendall WB, Headd JJ, Keedy DA, Immormino RM, Kapral GJ, Murray  
676 LW, Richardson JS, Richardson DC. 2010. MolProbity: all-atom structure  
677 validation for macromolecular crystallography. *Acta Crystallogr D Biol*  
678 *Crystallogr* **66**:12–21. doi:10.1107/S0907444909042073
- 679 Chiancone E, Ceci P, Ilari A, Ribacchi F, Stefanini S. 2004. Iron and proteins for iron  
680 storage and detoxification. *BioMetals* **17**:197–202.  
681 doi:10.1023/B:BIOM.0000027692.24395.76
- 682 Diekmann Y, Pereira-Leal JB. 2013. Evolution of intracellular compartmentalization.  
683 *Biochem J* **449**:319–331. doi:10.1042/BJ20120957
- 684 Emsley P, Lohkamp B, Scott WG, Cowtan K. 2010. Features and development of  
685 Coot. *Acta Crystallogr D Biol Crystallogr* **66**:486–501.  
686 doi:10.1107/S0907444910007493
- 687 Giessen TW, Orlando BJ, Verdegaal AA, Chambers MG, Gardener J, Bell DC,  
688 Birrane G, Liao M, Silver PA. 2019. Large protein organelles form a new iron  
689 sequestration system with high storage capacity. *Elife* **8**:1–23.  
690 doi:10.7554/eLife.46070
- 691 Giessen TW, Silver PA. 2017. Widespread distribution of encapsulin  
692 nanocompartments reveals functional diversity. *Nat Microbiol* **2**:17029.  
693 doi:10.1038/nmicrobiol.2017.29
- 694 Gouet P, Robert X, Courcelle E. 2003. ESPript/ENDscript: Extracting and rendering  
695 sequence and 3D information from atomic structures of proteins. *Nucleic Acids*  
696 *Res* **31**:3320–3. doi:10.1093/nar/gkg556
- 697 He D, Hughes S, Vanden-Hehir S, Georgiev A, Altenbach K, Tarrant E, Mackay CL,  
698 Waldron KJ, Clarke DJ, Marles-Wright J. 2016. Structural characterization of  
699 encapsulated ferritin provides insight into iron storage in bacterial  
700 nanocompartments. *Elife* **5**:e18972. doi:10.7554/eLife.18972
- 701 He D, Piergentili C, Ross J, Tarrant E, Tuck LR, Mackay CL, McIver Z, Waldron KJ,  
702 Clarke DJ, Marles-Wright J. 2019. Conservation of the structural and functional  
703 architecture of encapsulated ferritins in bacteria and archaea. *Biochem J*

- 704 **476**:975–989. doi:10.1042/bcj20180922
- 705 Iverson S V., Haddock TL, Beal J, Densmore DM. 2015. CIDAR MoClo: Improved  
706 MoClo Assembly Standard and New E. coli Part Library Enables Rapid  
707 Combinatorial Design for Synthetic and Traditional Biology. *ACS Synth Biol*  
708 **5**:151019092657002. doi:10.1021/acssynbio.5b00124
- 709 Jenkins MC, Lutz S. 2021. Encapsulin Nanocontainers as Versatile Scaffolds for the  
710 Development of Artificial Metabolons. *ACS Synth Biol* acssynbio.0c00636.  
711 doi:10.1021/acssynbio.0c00636
- 712 Kelly LA, Mezulis S, Yates C, Wass M, Sternberg M. 2015. The Phyre2 web portal  
713 for protein modelling, prediction, and analysis. *Nat Protoc* **10**:845–858.  
714 doi:10.1038/nprot.2015-053
- 715 Kerfeld CA, Heinhorst S, Cannon GC. 2010. Bacterial Microcompartments.  
716 Laguerre M, Saux M, Dubost JP, Carpy A. 1997. MLPP: A program for the  
717 calculation of molecular lipophilicity potential in proteinsPharmaceutical  
718 Sciences. John Wiley & Sons, Ltd. pp. 217–222. doi:10.1111/j.2042-  
719 7158.1997.tb00257.x
- 720 Lau YH, Giessen TW, Altenburg WJ, Silver PA. 2018. Prokaryotic  
721 nanocompartments form synthetic organelles in a eukaryote. *Nat Commun*  
722 **9**:1311. doi:10.1038/s41467-018-03768-x
- 723 Liebschner D, Afonine P V., Baker ML, Bunkóczi G, Chen VB, Croll TI, Hintze B,  
724 Hung L-W, Jain S, McCoy AJ, Moriarty NW, Oeffner RD, Poon BK, Prisant MG,  
725 Read RJ, Richardson JS, Richardson DC, Sammito MD, Sobolev O V.,  
726 Stockwell DH, Terwilliger TC, Urzhumtsev AG, Videau LL, Williams CJ, Adams  
727 PD, IUCr. 2019. Macromolecular structure determination using X-rays, neutrons  
728 and electrons: recent developments in *Phenix*. *Acta Crystallogr Sect D Struct*  
729 *Biol* **75**:861–877. doi:10.1107/S2059798319011471
- 730 Masson GR, Burke JE, Ahn NG, Anand GS, Borchers C, Brier S, Bou-Assaf GM,  
731 Engen JR, Englander SW, Faber J, Garlish R, Griffin PR, Gross ML, Guttman  
732 M, Hamuro Y, Heck AJR, Houde D, Iacob RE, Jørgensen TJD, Kaltashov IA,  
733 Klinman JP, Konermann L, Man P, Mayne L, Pascal BD, Reichmann D, Skehel  
734 M, Snijder J, Strutzenberg TS, Underbakke ES, Wagner C, Wales TE, Walters  
735 BT, Weis DD, Wilson DJ, Wintrode PL, Zhang Z, Zheng J, Schriemer DC, Rand  
736 KD. 2019. Recommendations for performing, interpreting and reporting  
737 hydrogen deuterium exchange mass spectrometry (HDX-MS) experiments. *Nat*  
738 *Methods* **16**:595–602. doi:10.1038/s41592-019-0459-y
- 739 McCoy AJ, Grosse-Kunstleve RW, Adams PD, Winn MD, Storoni LC, Read RJ.  
740 2007. Phaser crystallographic software. *J Appl Crystallogr* **40**:658–674.  
741 doi:10.1107/S0021889807021206
- 742 McHugh CA, Fontana J, Nemecek D, Cheng N, Aksyuk AA, Heymann JB, Winkler  
743 DC, Lam AS, Wall JS, Steven AC, Hoiczuk E. 2014. A virus capsid-like  
744 nanocompartment that stores iron and protects bacteria from oxidative stress.  
745 *EMBO J* **33**:1896–1911. doi:10.15252/embj.201488566
- 746 Nakane T, Lindahl E, Zivanov J, Hagen WJJH, Scheres SHWH, Kimanius D,  
747 Forsberg BBO, Nakane T, Forsberg BBO, Kimanius D, Hagen WJJH, Lindahl E,  
748 Scheres SHWH. 2018. New tools for automated high-resolution cryo-EM  
749 structure determination in RELION-3. *Elife* **7**:1–38. doi:10.7554/elife.42166
- 750 Nichols RJ, LaFrance B, Phillips NR, Oltrogge LM, Valentin-Alvarado LE, Bischoff  
751 AJ, Nogales E, Savage DF. 2020. Discovery and characterization of a novel  
752 family of prokaryotic nanocompartments involved in sulfur metabolism. *bioRxiv*.  
753 doi:10.1101/2020.05.24.113720

- 754 Pettersen EF, Goddard TD, Huang CC, Meng EC, Couch GS, Croll TI, Morris JH,  
755 Ferrin TE. 2021. UCSF ChimeraX: Structure visualization for researchers,  
756 educators, and developers. *Protein Sci* **30**:70–82. doi:10.1002/pro.3943
- 757 Piergentili C, Ross J, He D, Gallagher KJ, Stanley WA, Adam L, Mackay CL, Baslé  
758 A, Waldron KJ, Clarke DJ, Marles-Wright J. 2020. Dissecting the structural and  
759 functional roles of a putative metal entry site in encapsulated ferritins. *J Biol*  
760 *Chem*. doi:10.1074/jbc.RA120.014502
- 761 Prangishvili D, Sutter M, Boehringer D, Gutmann S, Gu S, Loessner MJ, Stetter KO,  
762 Weber-ban E, Ban N, Brevibacterium M. 2008. Structural basis of enzyme  
763 encapsulation into a bacterial nanocompartment **15**:939–947.  
764 doi:10.1038/nsmb.1473
- 765 Putri RM, Allende-Ballester C, Luque D, Klem R, Rousou K-A, Liu A, Traulsen CH-  
766 H, Rurup WF, Koay MST, Castón JR, Cornelissen JJLM. 2017. Structural  
767 Characterization of Native and Modified Encapsulins as Nanoplatforms for *in*  
768 *Vitro* Catalysis and Cellular Uptake. *ACS Nano* **11**:12796–12804.  
769 doi:10.1021/acsnano.7b07669
- 770 Rahmanpour R, Bugg TDH. 2013. Assembly in vitro of *Rhodococcus jostii* RHA1  
771 encapsulin and peroxidase DypB to form a nanocompartment. *FEBS J*  
772 **280**:2097–2104. doi:10.1111/febs.12234
- 773 Recalcati S, Gammella E, Buratti P, Cairo G. 2017. Molecular regulation of cellular  
774 iron balance. *IUBMB Life* **69**:389–398. doi:10.1002/iub.1628
- 775 Rohou A, Grigorieff N. 2015. CTFFIND4: Fast and accurate defocus estimation from  
776 electron micrographs. *J Struct Biol* **192**:216–21. doi:10.1016/j.jsb.2015.08.008
- 777 Schindelin J, Arganda-Carreras I, Frise E, Kaynig V, Longair M, Pietzsch T,  
778 Preibisch S, Rueden C, Saalfeld S, Schmid B, Tinevez J-Y, White DJ,  
779 Hartenstein V, Eliceiri K, Tomancak P, Cardona A. 2012. Fiji: an open-source  
780 platform for biological-image analysis. *Nat Methods* **9**:676–682.  
781 doi:10.1038/nmeth.2019
- 782 Sievers F, Higgins DG. 2014. Clustal Omega, accurate alignment of very large  
783 numbers of sequences. *Methods Mol Biol* **1079**:105–16. doi:10.1007/978-1-  
784 62703-646-7\_6
- 785 Snijder J, Kononova O, Barbu IM, Uetrecht C, Rurup WF, Burnley RJ, Koay MST,  
786 Cornelissen JJLM, Roos WH, Barsegov V, Wuite GJL, Heck AJR. 2016.  
787 Assembly and Mechanical Properties of the Cargo-Free and Cargo-Loaded  
788 Bacterial Nanocompartment Encapsulin. *Biomacromolecules* **17**:2522–9.  
789 doi:10.1021/acs.biomac.6b00469
- 790 Studier F. 2005. Protein production by auto-induction in high-density shaking  
791 cultures. *Protein Expr Purif* **41**:207–234. doi:10.1016/j.pep.2005.01.016
- 792 Tamura A, Fukutani Y, Takami T, Fujii M, Nakaguchi Y, Murakami Y, Noguchi K,  
793 Yohda M, Odaka M. 2015. Packaging guest proteins into the encapsulin  
794 nanocompartment from *Rhodococcus erythropolis* N771. *Biotechnol Bioeng*  
795 **112**:13–20. doi:10.1002/bit.25322
- 796 Williams EM, Jung SM, Coffman JL, Lutz S. 2018. Pore Engineering for Enhanced  
797 Mass Transport in Encapsulin Nanocompartments. *ACS Synth Biol* **7**:2514–  
798 2517. doi:10.1021/acssynbio.8b00295
- 799 Xiong X, Sun C, Vago FS, Klose T, Zhu J, Jiang W. 2020. Cryo-EM structure of  
800 heterologous protein complex loaded thermotoga maritima encapsulin capsid.  
801 *Biomolecules* **10**:1–13. doi:10.3390/biom10091342
- 802 Yeates TO, Kerfeld CA, Heinhorst S, Cannon GC, Shively JM. 2008. Protein-based  
803 organelles in bacteria: carboxysomes and related microcompartments. *Nat Rev*

804            *Microbiol* **6**:681–691. doi:10.1038/nrmicro1913  
805        Zheng SQ, Palovcak E, Armache J-P, Verba KA, Cheng Y, Agard DA. 2017.  
806            MotionCor2: anisotropic correction of beam-induced motion for improved cryo-  
807            electron microscopy. *Nat Methods* **14**:331–332. doi:10.1038/nmeth.4193  
808  
809

## 810 Funding

811 This work was supported a Royal Society Research Grant awarded to JMW  
812 [RG130585] and a BBSRC New Investigator Grant to JMW and DJC [BB/N005570/1].  
813 CP was funded by the BBSRC New Investigator Grant [BB/N005570/1]. JMW is  
814 funded by Newcastle University. DJC and JR are funded by the University of  
815 Edinburgh. JR was funded by a BBSRC EastBio DTP studentship [BB/M010996/1].  
816 ZM is funded by a BBSRC NLD DTP studentship [BB/M011186/1]. JEB was funded  
817 by DSTL via Imperial College. EZA was funded by an IBioC PhD studentship with  
818 Fujifilm Diosynth Biotechnologies. KJW was funded by the Biotechnology and  
819 Biological Sciences Research Council (BB/S006818/1)

820 Equipment for Transmission Electron Microscopy was funded through the  
821 BBSRC 17ALERT call [BB/R013942/1]. MDW's work is supported by the Wellcome  
822 Trust and Royal Society (210493), Medical Research Council (T029471/1), and the  
823 University of Edinburgh. The Wellcome Centre for Cell Biology is supported by core  
824 funding from the Wellcome Trust (203149).

## 825 Acknowledgements

826 We acknowledge Diamond Light Source for access and support of the cryo-EM  
827 facilities at the UK's national Electron Bio-imaging Centre (eBIC) [under proposal  
828 EM16637], funded by the Wellcome Trust, MRC and BBSRC. We thank Dr Yun Song  
829 for their assistance at eBIC with sample loading and data collection setup. This  
830 research made use of the Rocket High Performance Computing service at Newcastle  
831 University. We thank Dr Karen Bower for assistance with the use of the Rocket service.  
832 Grid screening was performed in the Edinburgh cryo-EM facility in School of Biological  
833 Sciences at the University of Edinburgh. The cryo-EM facility was set up with funding  
834 from the Wellcome Trust (087658/Z/08/Z) and SULSA.

835 and is supported by the Wellcome Centre for Cell Biology.

## 836 Author Contributions

837 Conceptualization: JR, JMW, DJC

838 Methodology: JR, ZM, TL, CP, AMBL, JMW, DJC

839 Validation: JR, ZM, TL, JMW, DJC

840 Formal analysis: JR, ZM, TL, JMW, DJC

841 Investigation: JR, ZM, KG, JEB, CP, EZA

842 Resources: KG, FC, CLM, JEB, AMBL, EZA, MDW

843 Data curation: JR, TL, DJC, AMBL, JMW

844 Writing – original draft preparation: JR, DJC, JMW

845 Writing – review and editing: JR, ZM, CP, AMBL, MDW, KJW, JMW, DJC

846 Visualization: JR, ZM, TL, DJC, JMW

847 Supervision: JMW, DJC

848 Funding acquisition: MDW, LEH, KJW, DJC, JMW

849

850

851



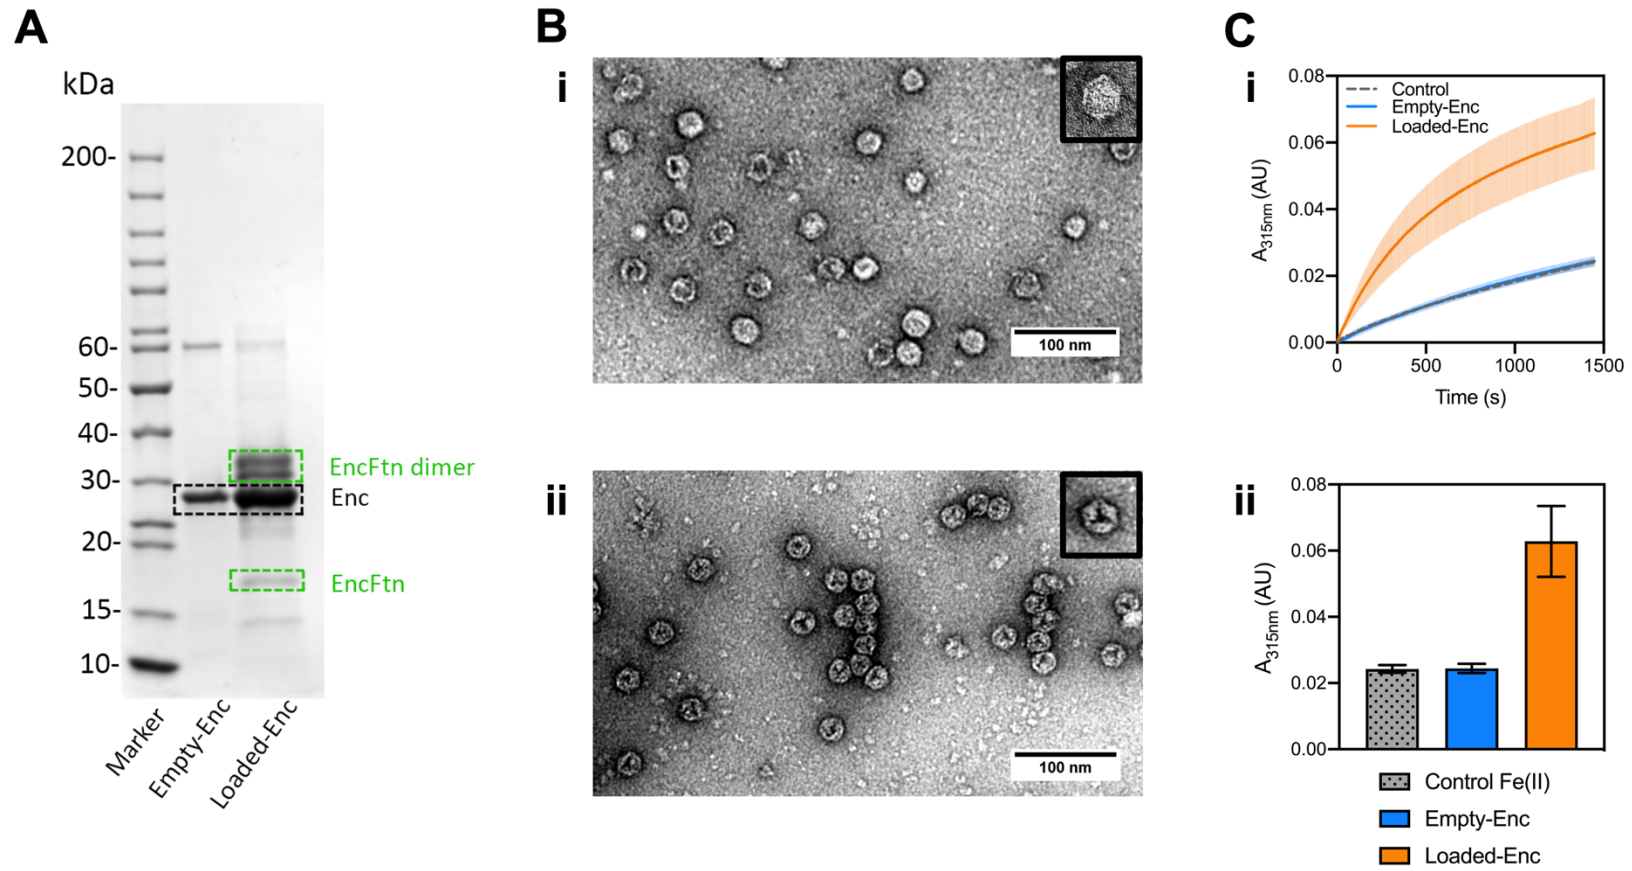

**Figure 1. Validation of the Assembly and Activity of Loaded-Enc and Empty-Enc.**

857 **A:** SDS-PAGE of purified Empty-Enc and Loaded-Enc. Proteins resolved by 15% acrylamide SDS-PAGE and stained with  
858 Coomassie blue stain. Encapsulin bands are near the 30 kDa marker and highlighted by a black dashed box. The EncFtn cargo of  
859 Loaded-Enc appears as both a monomer and dimer. The purified EncFtn monomer is highlighted by a box labelled 'EncFtn'. Two  
860 overlapping bands at approximately 35 kDa are highlighted by a green dashed box and labelled as 'EncFtn dimer'. **B:** Negative  
861 stain transmission micrographs of Empty-Enc (**i**) and Loaded-Enc (**ii**) displaying individual particles for each complex. One  
862 nanocompartment of Empty-Enc and Loaded-Enc is shown in the upper right corner of each micrograph, with a hexagonal 2D  
863 geometry observed. **C: i:** Ferroxidase activity of Loaded-Enc compared to Empty-Enc. Protein samples were mixed with 100  $\mu$ M  
864  $\text{FeSO}_4 \cdot 27\text{H}_2\text{O}$ . Following an incubation period at room temperature of 50 seconds absorbance at 315 nm was measured over a  
865 time-course of 1450 seconds. Control reference established using enzyme-free reaction as a measure of background iron  
866 oxidation. Lines represent the mean of three technical repeats, error bars represent the standard deviation from the mean. **ii:** End  
867 point ferroxidase assay comparison. Ferroxidase activity shown by the total increase in  $A_{315 \text{ nm}}$  at the end point of the assay. Bars  
868 represent the mean of three technical repeats, error bars represent the standard deviation from the mean.  
869  
870



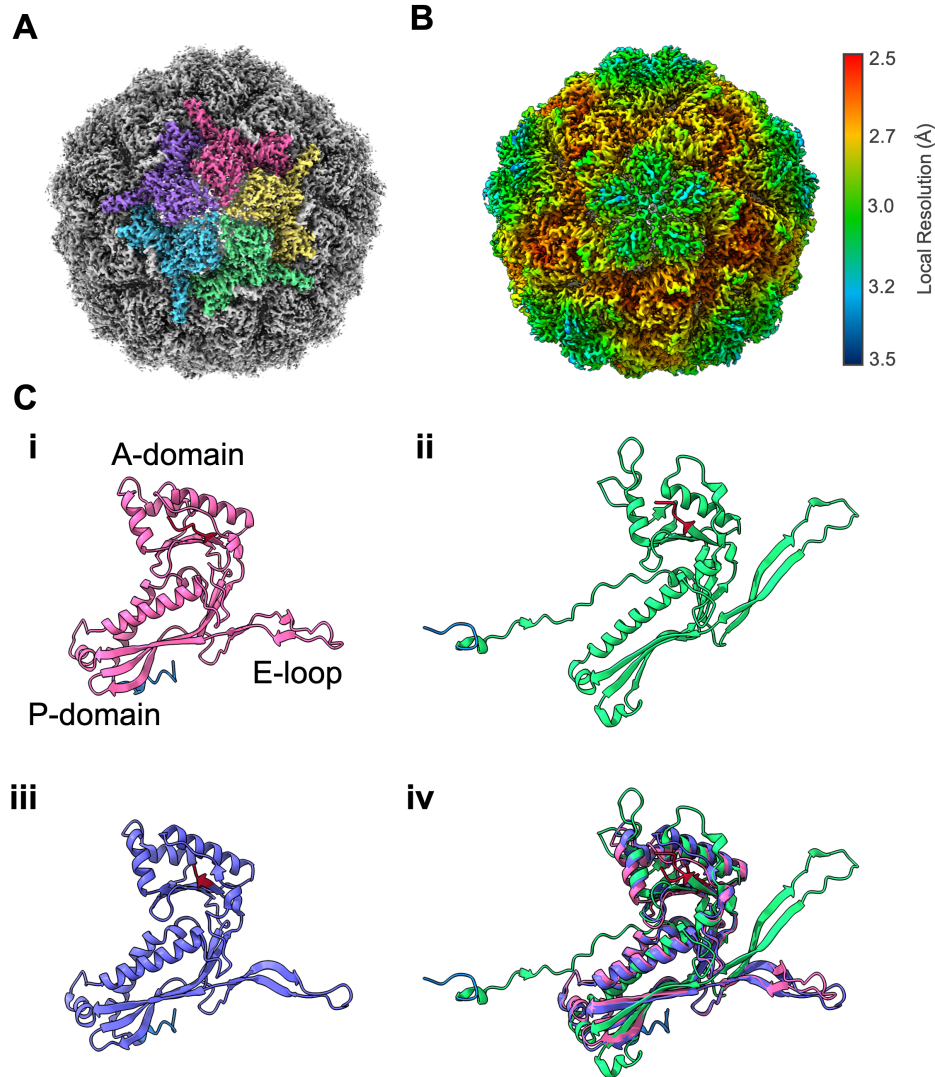

871  
872

**Figure 2: Architecture of the *H. ochraceum* encapsulin nanocompartment shell**  
Visualization of the electronic potential map of the *H. ochraceum* encapsulin from an icosahedrally averaged single particle reconstruction. **A:** The exterior of the encapsulin shell visualized at 2.4 Å resolution. Five subunits of the encapsulin nanocompartment shell have been colored to highlight the 5-fold axis. **B:** Icosahedral EM map of Loaded-Enc sharpened by local resolution estimate and colored by local resolution. The estimated resolution varies across the exterior of the encapsulin nanocompartment with the lowest resolution at the 5-fold pores. Color key of resolution mapping is shown on the right-hand side of the figure. **C:** The shared phage-like fold in the HK97 bacteriophage capsid and encapsulin proteins. Monomeric subunits of the *H. ochraceum* encapsulin protein modelled from our reconstruction are shown (pink, **C i**), with comparisons to the HK97 bacteriophage Head II  $T=7$  monomer (green, **C ii**, PDB: 2FT1), and the *T. maritima*  $T=1$  monomer (purple, **C iii**, PDB: 3DKT). The N-terminus of each monomer is highlighted in blue and the C-terminus in red **C iv**: Comparison of the structures of **i** (pink), **ii** (green) and **iii** (purple) showing similar A- and P-domains. A noticeable difference between the monomers is that the E-loop of **ii** is shifted away from the others, which is typical of icosahedral encapsulin structures with a  $T$ -number greater than 1.

873  
874  
875  
876  
877  
878  
879  
880  
881  
882  
883  
884  
885  
886  
887  
888  
889  
890

891

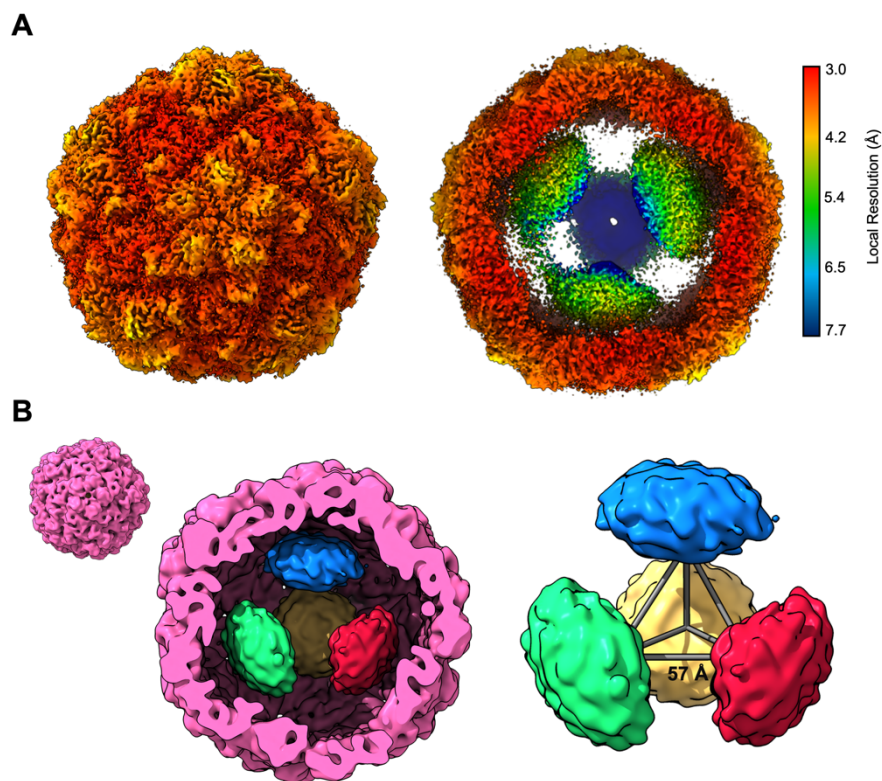

892

893

894

895 **Figure 3: Asymmetric reconstruction of the *H. ochraceum* encapsulin complex**  
896 **reveals a tetrahedral arrangement of EncFtn within the encapsulin**  
897 **nanocompartment.**

898 **A:** Electronic potential map of the asymmetric reconstruction of the *H. ochraceum*  
899 Enc:EncFtn complex. The map is colored by local resolution, highlighting the internal  
900 organization of EncFtn within Loaded-Enc. The interior of the nanocompartment  
901 holds four EncFtn, which are of significantly lower resolution than the shell. The color  
902 key for the local resolution is shown on the right side of **A**. **B:** Gaussian smoothed C1  
903 map showing the four discrete EncFtn densities (red, green, yellow and blue),  
904 consistent with the size of a decameric EncFtn complexes, within the encapsulin  
905 nanocompartment (pink). The four EncFtn are in a tetrahedral arrangement  
906 highlighted by grey lines connecting their centers of mass. The average distance  
907 between each EncFtn decamer is 57 Å.

908

909

910  
911

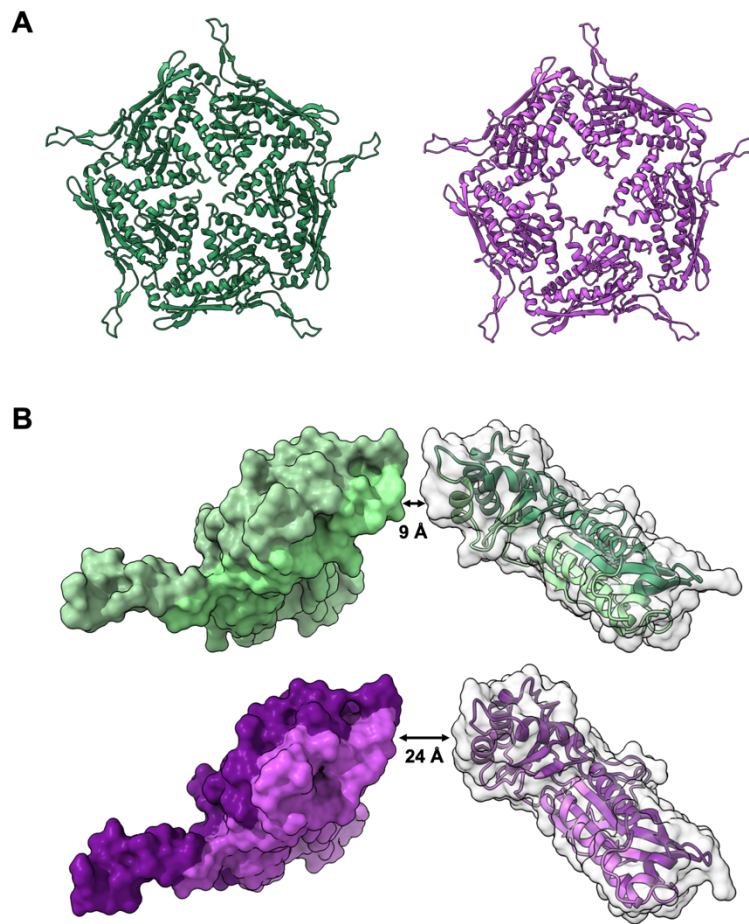

912  
913  
914  
915  
916  
917  
918  
919  
920  
921  
922  
923  
924  
925  
926  
927

**Figure 4: Conformations of the dynamic 5-fold pore of the *H. ochraceum* encapsulin shell.**

Masked 3D refinements centered around the 5-fold pore of the icosahedral reconstruction were performed after symmetry expansion of the asymmetric units. **A:** Cartoon representations of the 'closed' (green) and 'open' (purple) conformations of the Enc shell pentamer. The closed conformation has a 5-fold pore diameter of 9 Å whilst the equivalent diameter of the open conformation is 24 Å. **B:** Side-on view of the 5-fold pore highlighting its increased diameter in the open conformation (purple) compared to the closed conformation (green). The interior face of encapsulin for the closed and open conformations is shown in light green and light purple respectively.

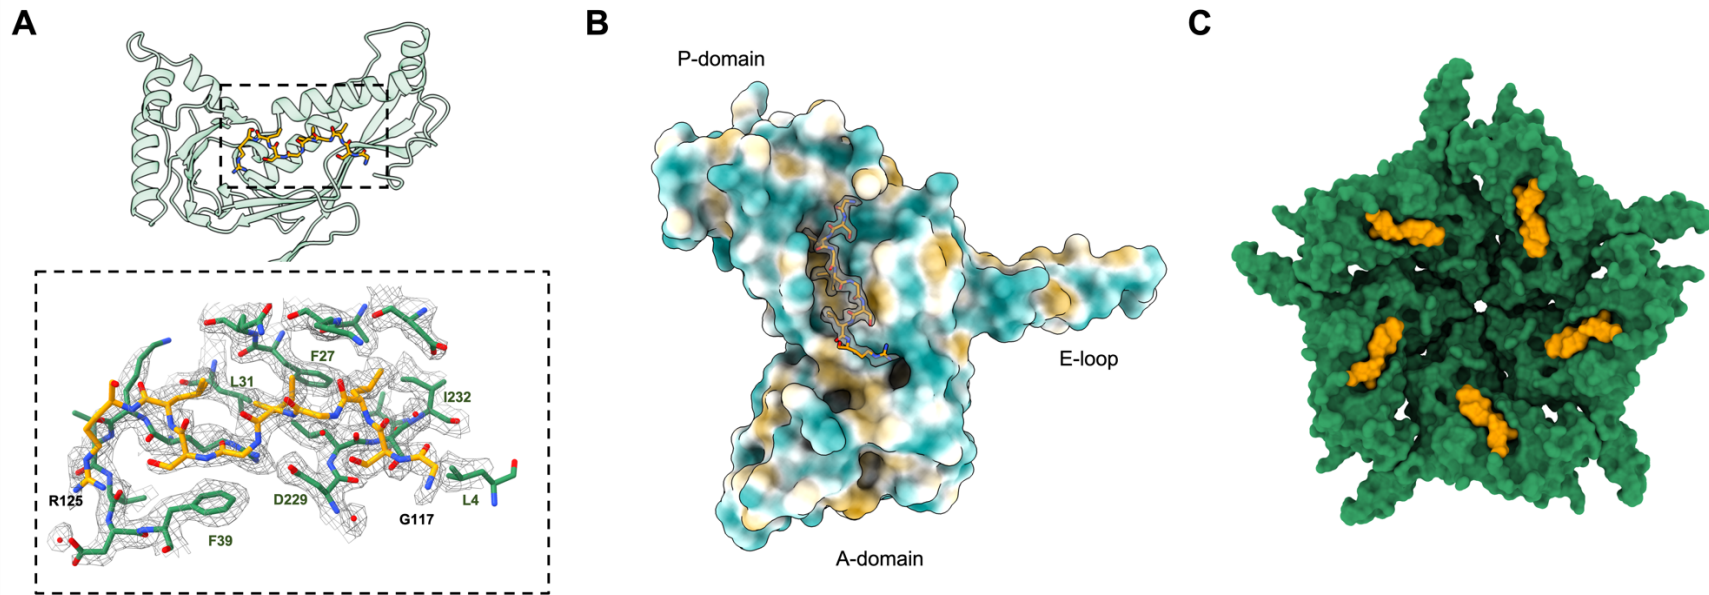

928  
 929  
 930  
 931  
 932  
 933  
 934  
 935  
 936  
 937  
 938  
 939  
 940  
 941

**Figure 5: The closed conformation of the *H. ochraceum* five-fold pore allows docking and sequencing of the EncFtn localization sequence to the interior face of the encapsulin monomer.**

**A:** Binding of localization sequence residues from the EncFtn to the interior wall of the encapsulin nanocompartment monomer (green residues and transparent cartoon) and the localization sequence (yellow sticks). Lower panel: Hydrophobic residues from the interior face of the encapsulin form the binding pocket for the localization sequence. The first and last residues modelled for the LS have been labelled in black, and key residues from encapsulin have been labelled in green. **B:** The spatial relationship between an encapsulin monomer and the localization sequence (shown in gold with its EM map density as in **A**). The Enc monomer has been colored by molecular lipophilicity potential (Laguerre et al., 1997) which ranges from dark cyan (corresponding to the most hydrophilic) to white to dark gold (most lipophilic). This highlights the hydrophobic pocket on the interior of the encapsulin nanocompartment where the localization sequenced binds. **C:** The 'closed' conformation pentamer (green) with a localization sequence (yellow) shown on each monomer.



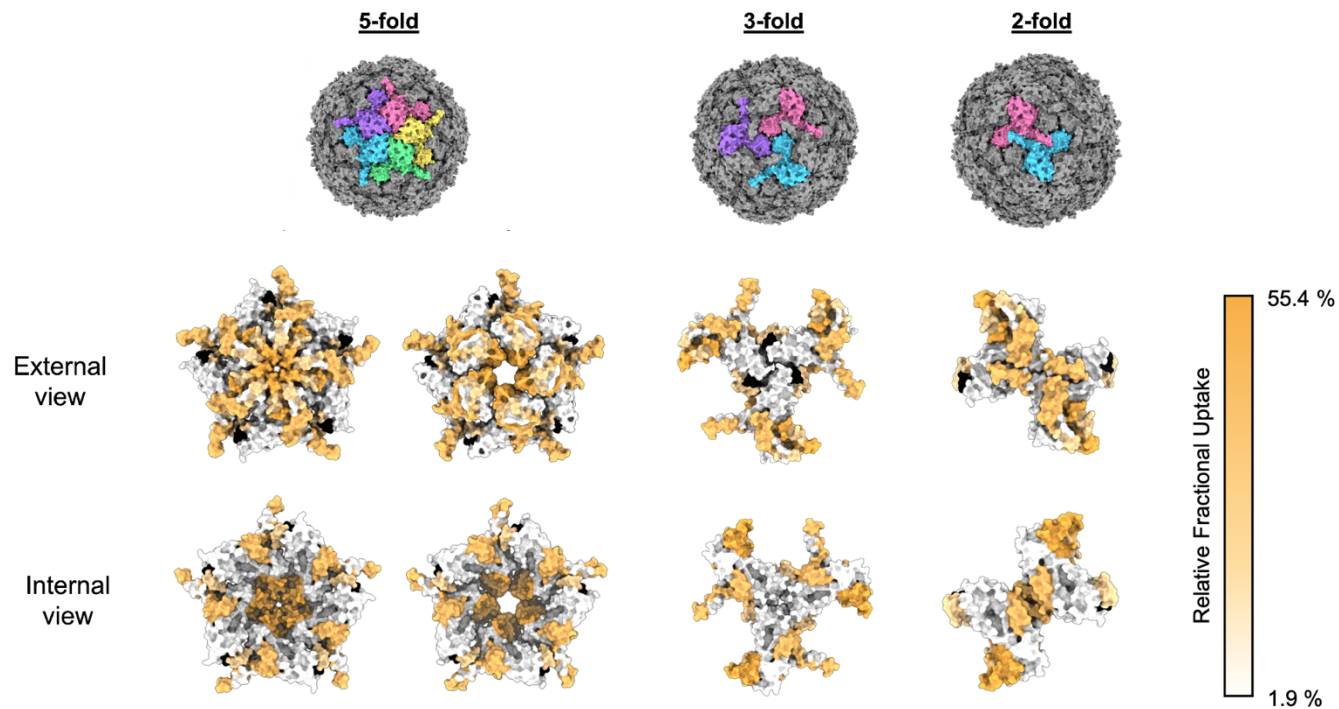

942  
943  
944  
945  
946  
947  
948  
949  
950

**Figure 6: HDX-MS fractional uptake mapped to the symmetry axes of the icosahedral reconstruction of the *H. ochraceum* encapsulin complex.**

From top to bottom: The top row depicts molecular surface models of the *H. ochraceum* encapsulin in three orientations to show the 5-fold, 3-fold and 2-fold symmetry axes. Monomers have been colored individually (pink, yellow, green, blue and purple) to highlight the symmetry axes. The final two rows display the relative fractional uptake of each peptide from HDX experiments displayed on the 5-fold, 3-fold and 2-fold pores of the encapsulin nanocompartment. Peptide fractional uptake is shown on a white-to-orange color scale with a color key shown on the right-hand side of the figure. Areas colored black correspond to no peptide coverage.

# Pore dynamics and asymmetric cargo loading in an encapsulin nanocompartment revealed by Cryo-EM and hydrogen/deuterium exchange mass spectrometry

## Supplementary Figures

**Figure 1 – figure supplement 1: Purification of recombinant Empty-Enc and Loaded-Enc protein complexes.**

**Figure 2 – figure supplement 1: Supplementary cryo-EM data from the icosahedral reconstruction.**

**Figure 2 – figure supplement 2: Cryo-EM Processing Workflow**

**Figure 3 – figure supplement 1: Supplementary cryo-EM data of Loaded-Enc.**

**Figure 3 – figure supplement 2: The four EncFtn environments within the icosahedral encapsulin nanocompartment viewed from the outside of the encapsulin nanocompartment.**

**Figure 4 – figure supplement 1: Symmetry expansion EM maps**

**Figure 4 – figure supplement 2: Model fit of the ‘open’ and ‘closed’ structures into the symmetry expansion maps**

**Figure 4 – figure supplement 3: Comparison of the A-domain of ‘closed’ and ‘open’ pentamer structures**

**Figure 4 – figure supplement 4: Sequence alignment of encapsulins and HK97.**

**Figure 4 – figure supplement 5: Electrostatic properties of the encapsulin nanocompartment pores.**

**Figure 6 – figure supplement 1: Sequence coverage of deuterium uptake of Empty-Enc and Loaded-Enc peptides.**

**Figure 6 – figure supplement 2: Deuterium fractional uptake of Loaded-Enc peptides.**

**Figure 6 – figure supplement 3: Differential HDX MS analysis of Empty-Enc and Loaded-Enc.**

## A: Empty-Enc

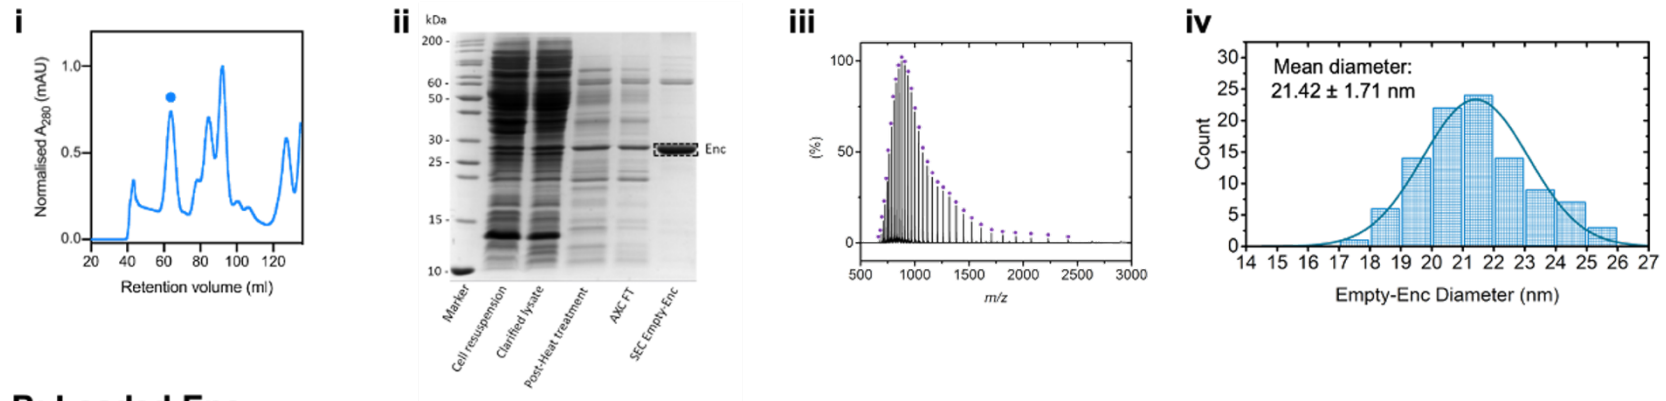

## B: Loaded-Enc

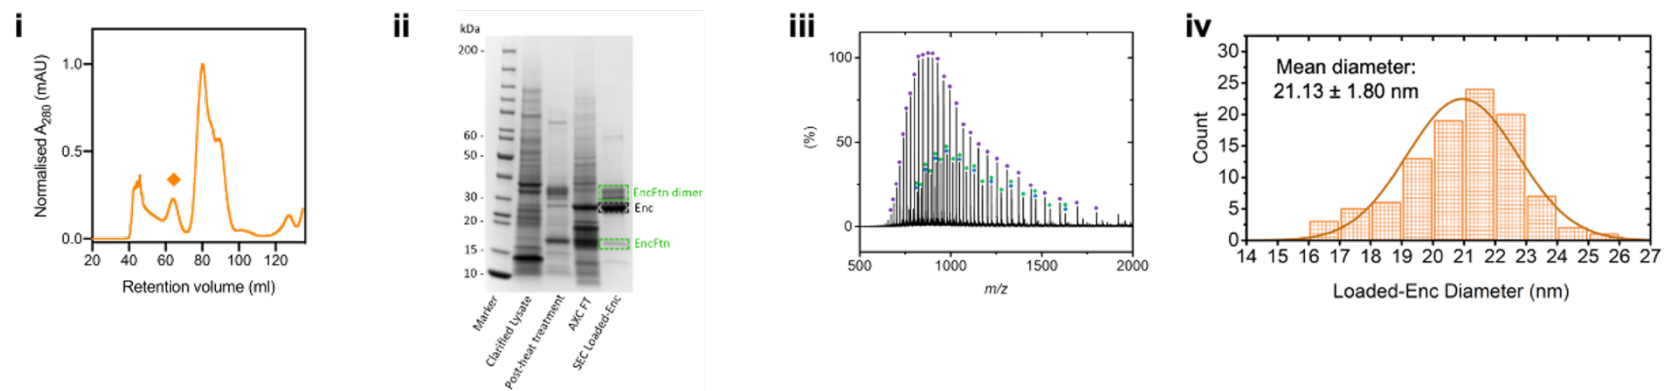

**Figure 1 – figure supplement 1: Purification of recombinant *H. ochraceum* encapsulin protein complexes.**

**A:** i. Size exclusion chromatogram traces of Empty-Enc with normalised  $A_{280}$  values. Empty-Enc (●) eluted at a retention volume of 65 ml. Other peaks represent contaminants and encapsulin monomers. ii. SDS-PAGE of Empty-Enc samples at different stages of purification. Proteins were resolved by 15% acrylamide SDS-PAGE and stained with Coomassie blue stain. The encapsulin band is near the 30 kDa marker of the PageRuler Unstained Protein Ladder (highlighted with a dashed black box). iii. Mass spectrum of Empty-Enc displaying one charge state distribution (highlighted with purple circles), which corresponds to the mass of the encapsulin monomer protein (28969.7 Da). iv. Histograms of the size distribution of Empty-Enc from negative stain TEM. A Gaussian curve was fitted to the data by nonlinear least squares regression, showing that individual Empty-Enc nanocompartments have a mean diameter of 21.13 nm with a standard

deviation of 1.80 nm. **B:** **i.** Size exclusion chromatogram trace of Loaded-Enc. Loaded-Enc elutes at 65 ml, the peak is stressed with an orange diamond (◆) Non-encapsulated EncFtn proteins are eluted at 80ml, exclusively in the Loaded-Enc SEC run. **ii.** SDS-PAGE of loaded-Enc at different stages of the purification. Proteins were resolved by 15% acrylamide SDS-PAGE and stained with Coomassie blue stain. Loaded-Enc encapsulin band is near 30 kDa (highlighted with a dashed black box) and the EncFtn bands are highlighted by dashed green boxes. EncFtn exists as both monomer and dimer bands, as is typical for these proteins. **iii:** Mass spectrum of proteins present in Loaded-Enc are highlighted by coloured circles; encapsulin nanocompartment protein in purple (28813.2 Da), EncFtn monomer in blue (14667.4 Da), and EncFtn dimer in green (29334.5 Da). **iv:** Histogram of the size distribution of Loaded-Enc as observed by negative stained TEM. Nanocompartments of Loaded-Enc were found to have an average diameter of 21.42 nm with a standard deviation of 1.71 nm.



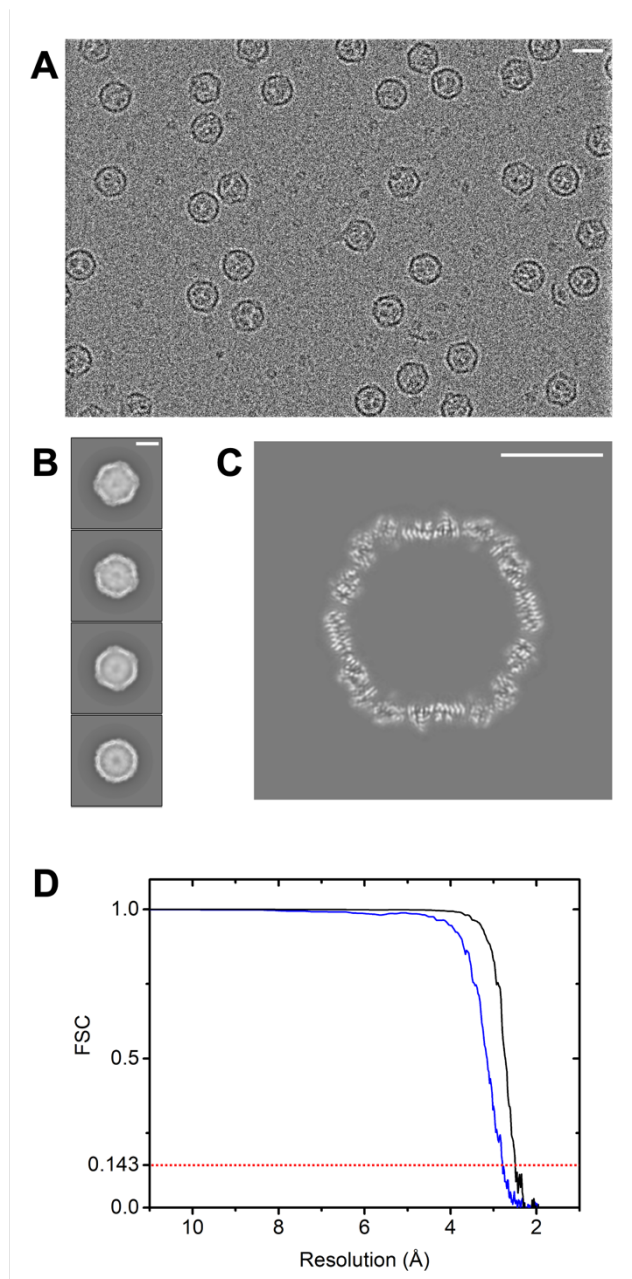

**Figure 2 – figure supplement 1: Representative cryo-EM micrograph and additional data from the icosahedral reconstruction of the *H. ochraceum* encapsulin complex**

**A:** Representative cryo-EM micrograph of Loaded-Enc. **B:** 2D classes of Loaded-Enc **C:** Central slice of Loaded-Enc from icosahedral processing. A white scale bar representing 10 nm is shown in the upper right corner of **A**, **B** and **C**. **D:** Gold standard FSC curve of the masked (black) and unmasked (blue) icosahedral reconstruction half maps. The FSC 0.143 threshold is highlighted with a dashed red line.

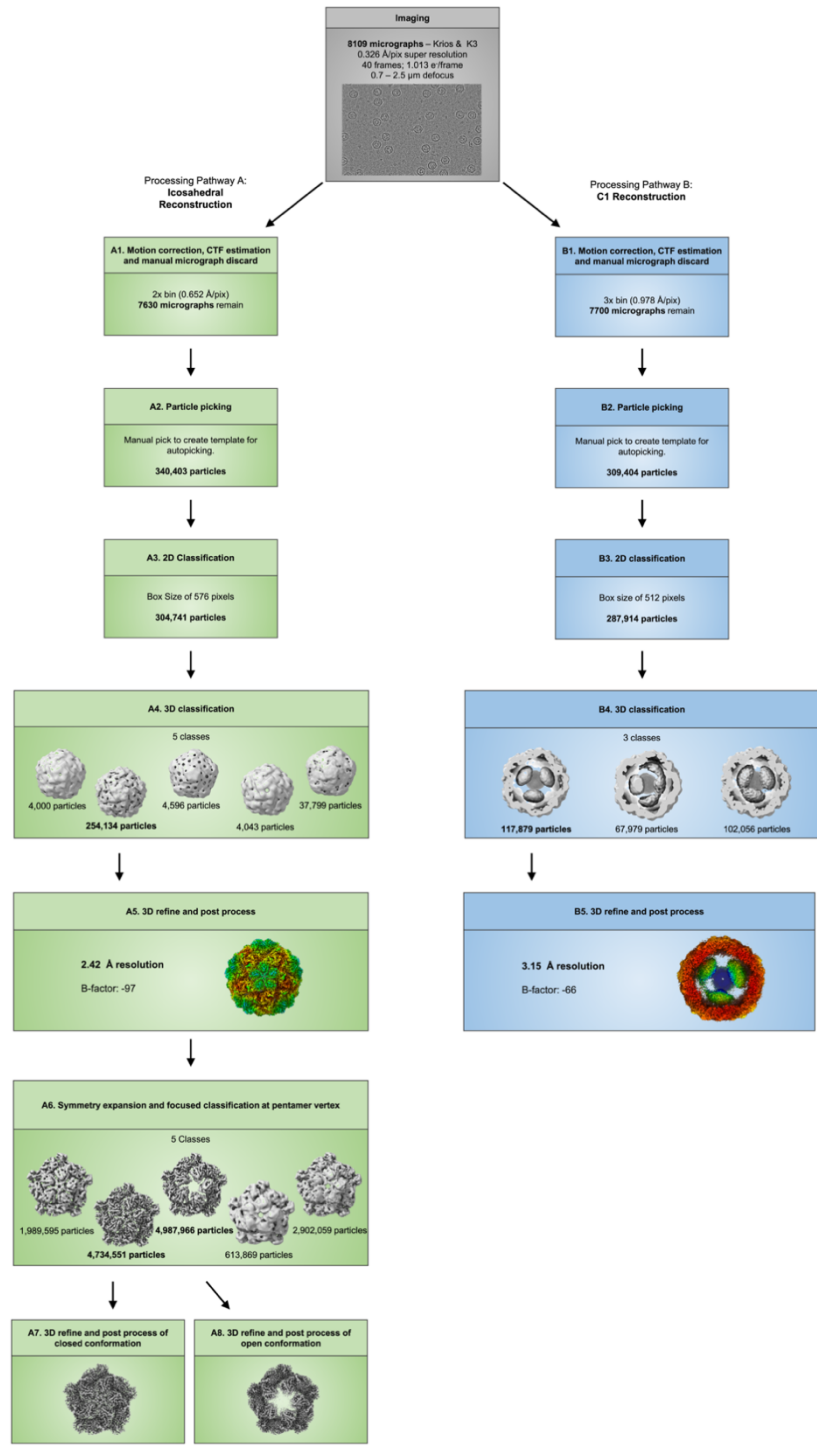

**Figure 2 – figure supplement 2: Cryo-EM Processing Workflow**

The processing pipeline within Relion 3.1 used to obtain the single particle reconstruction of Loaded-Enc. The green and blue boxes highlight divergence in the workflow where two approaches were executed simultaneously to obtain the highest possible resolution structures of exterior and interior of Loaded-Enc.

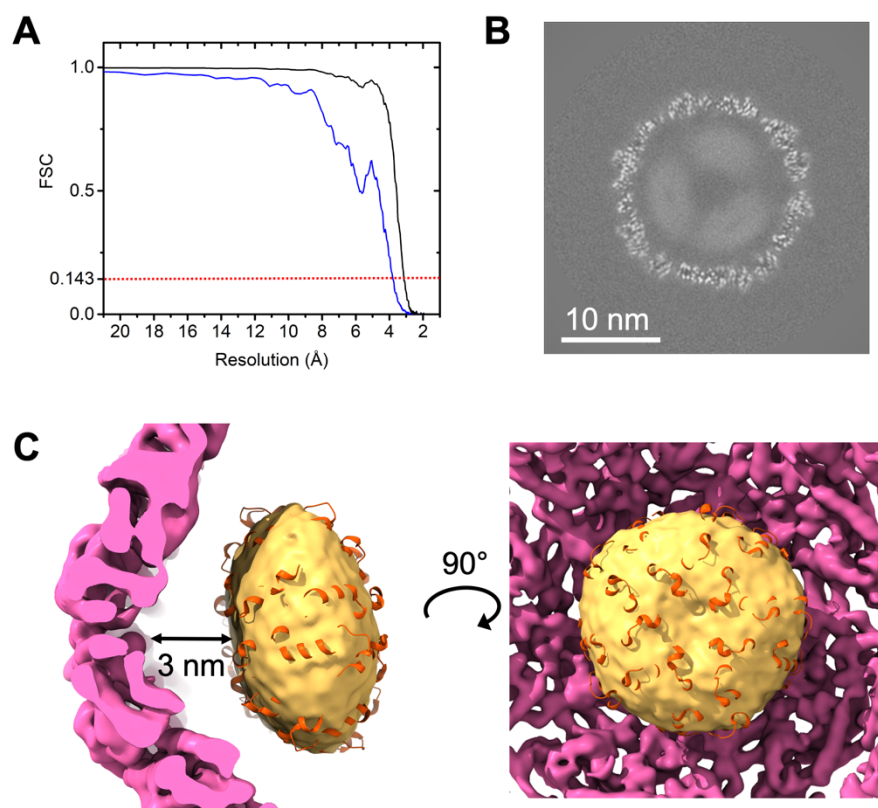

**Figure 3 – figure supplement 1: Supplementary cryo-EM data of Loaded-Enc C1 reconstruction.**

**A:** Gold standard FSC curve of the masked (black) and unmasked (blue) icosahedral reconstruction half maps. The FSC 0.143 threshold is highlighted with a dashed red line. **B:** Central slice of Loaded-Enc from C1 reconstruction after 3D refinement. A white scale bar representing 10 nm is shown in the lower left corner. **C:** The crystal structure of the EncFtn from *H. ochraceum* (orange, PDB 5N5F) docked into the interior density (yellow) of the C1 reconstruction. A 3 nm gap is observed between the Enc shell (pink) and the EncFtn (yellow and orange).

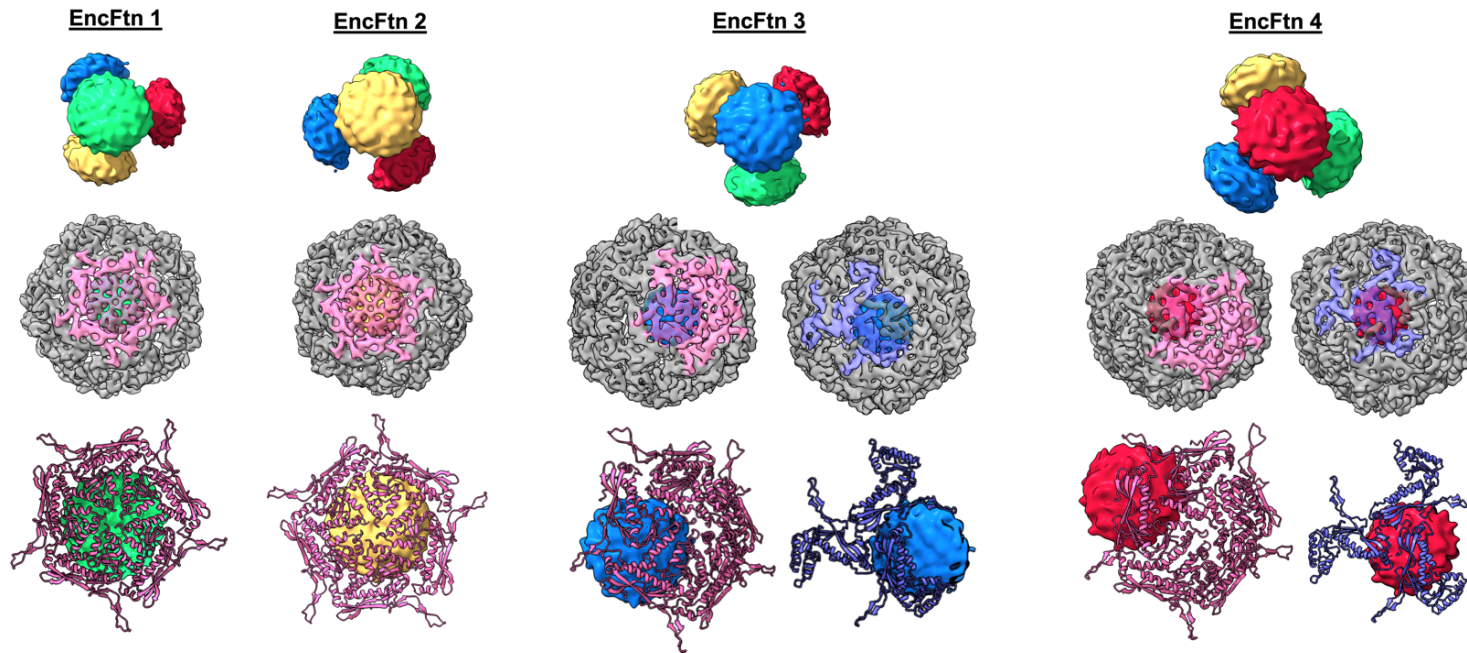

**Figure 3 – figure supplement 2: Visualization of the distinct EncFtn environments within the icosahedral encapsulin nanocompartment.**

**Top panels:** Each EncFtn within the encapsulin nanocompartment has been individually colored (as in **Figure 4 C**) and numbered. Four orientations of EncFtn tetrahedral are shown with a different EncFtn in the foreground. **Middle panels:** Each EncFtn of the Loaded-Enc complex as viewed from outside of the encapsulin nanocompartment. EncFtn complexes are in the same orientation as the top panels. A pentamer of the encapsulin nanocompartment has been colored pink to allow direct correlation between the EncFtn location and the 5-fold pore of encapsulin. EncFtn 3 and EncFtn 4 do not align with the 5-fold pore and so the encapsulin 3-fold pore has also been shown and colored purple. **Bottom panels:** The relationship between each EncFtn and the pores of encapsulin. The encapsulin 5-fold pore is shown by pink cartoons, the encapsulin 3-fold pore by purple cartoons and the EncFtn are colored as in the top panels. EncFtn 1 and EncFtn 2 are in broadly equivalent environments which are aligned with the 5-fold pore of the encapsulin nanocompartment.

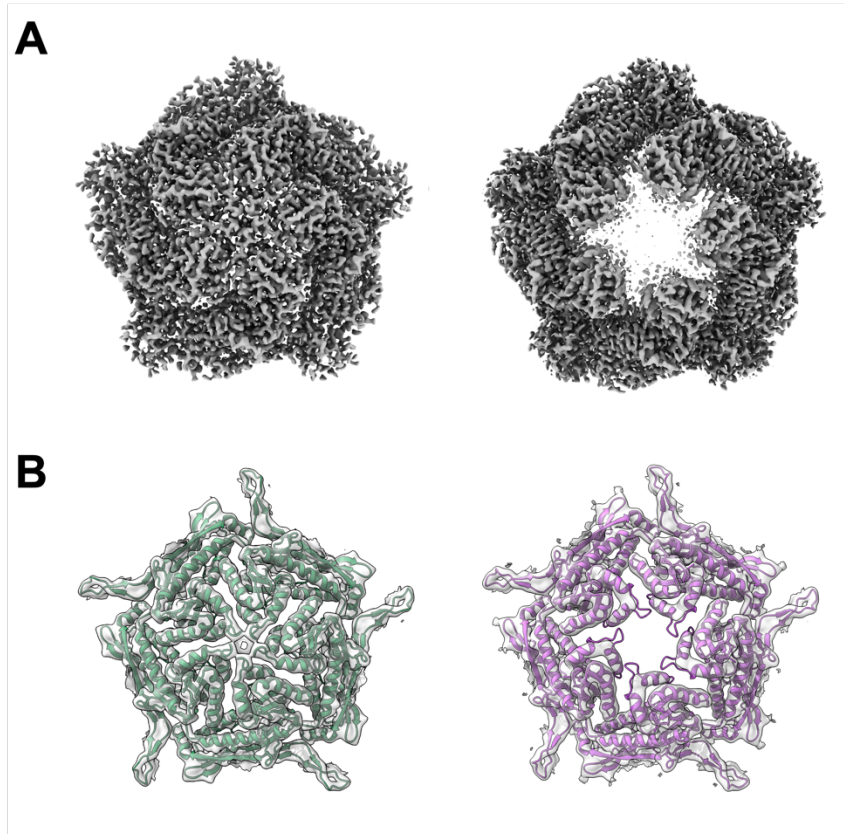

**Figure 4 – figure supplement 1: Electronic potential maps and models from masked 3D-classification and refinement centered on the five-fold symmetry axis of icosahedral reconstruction.**

**A:** CryoEM maps of the 'closed' (left) and 'open' (right) pentamer conformations from symmetry expansion of the icosahedral five-fold axis. **B:** The Gaussian smoothed cryoEM maps with docked models of the 'closed' (green, left) and 'open' (purple, right) conformations. Smoothed EM maps allow easy visualization of the docked secondary structure.



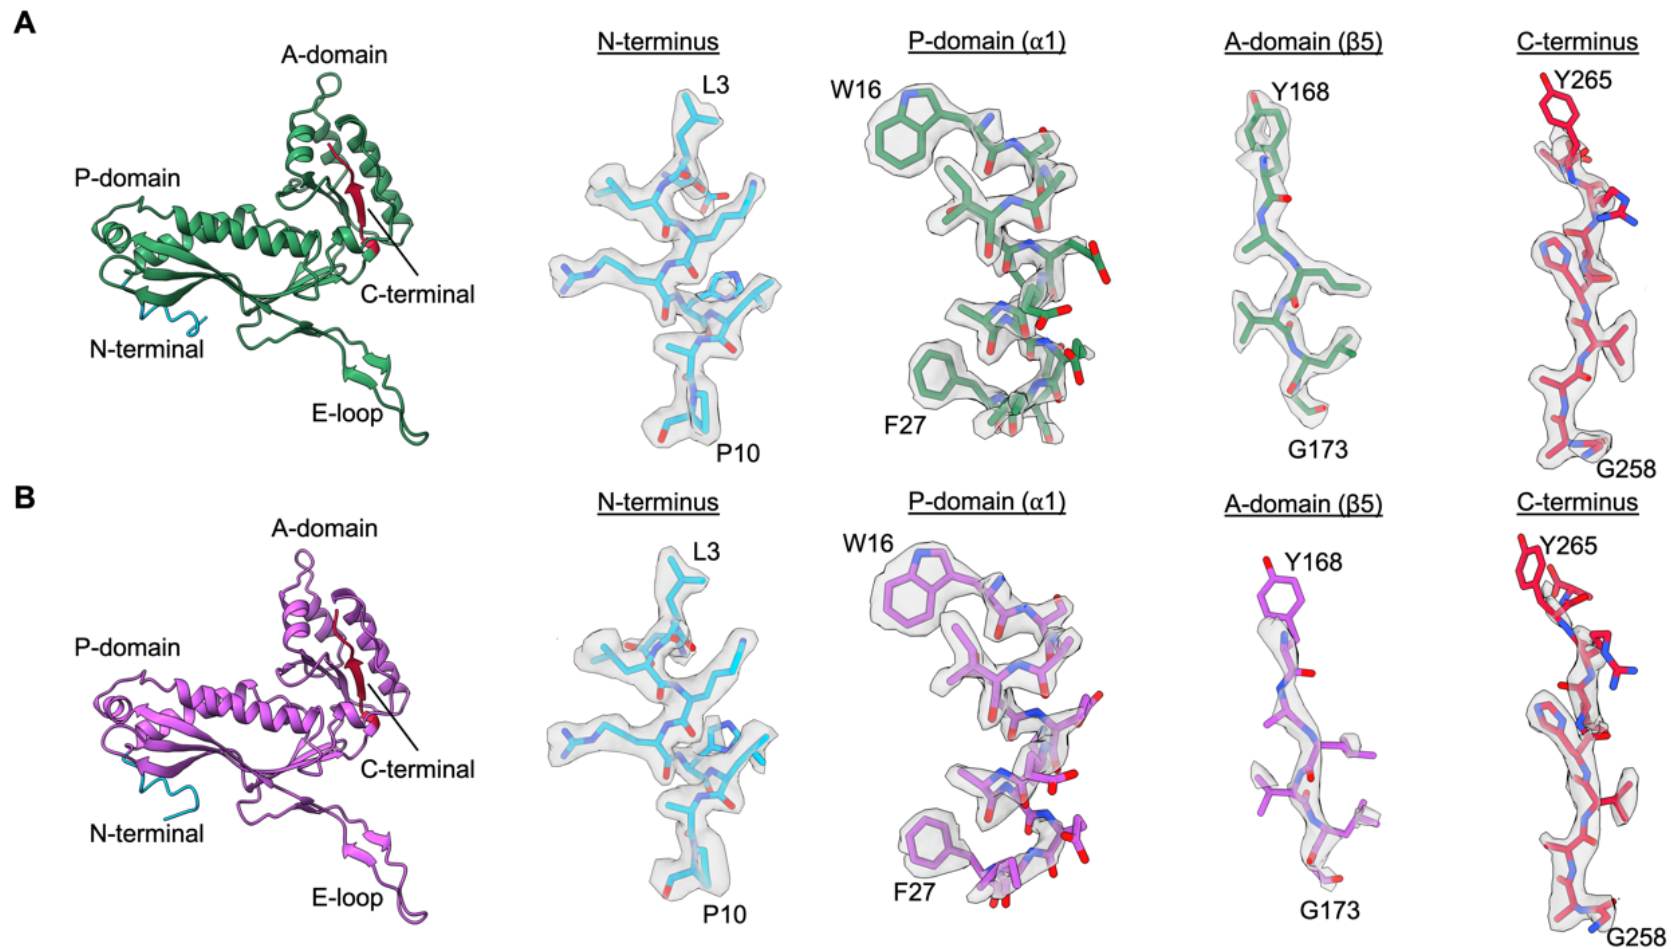

**Figure 4 – figure supplement 2: Model fit of the ‘open’ and ‘closed’ atomic models produced from open and closed maps**

The atomic models of the monomer subunit of the ‘closed’ (green, **A**) and ‘open’ (purple, **B**) pentamer conformations. Representative maps are shown across the monomer chain illustrating the fit of the atomic model and side chains into the cryoEM map.

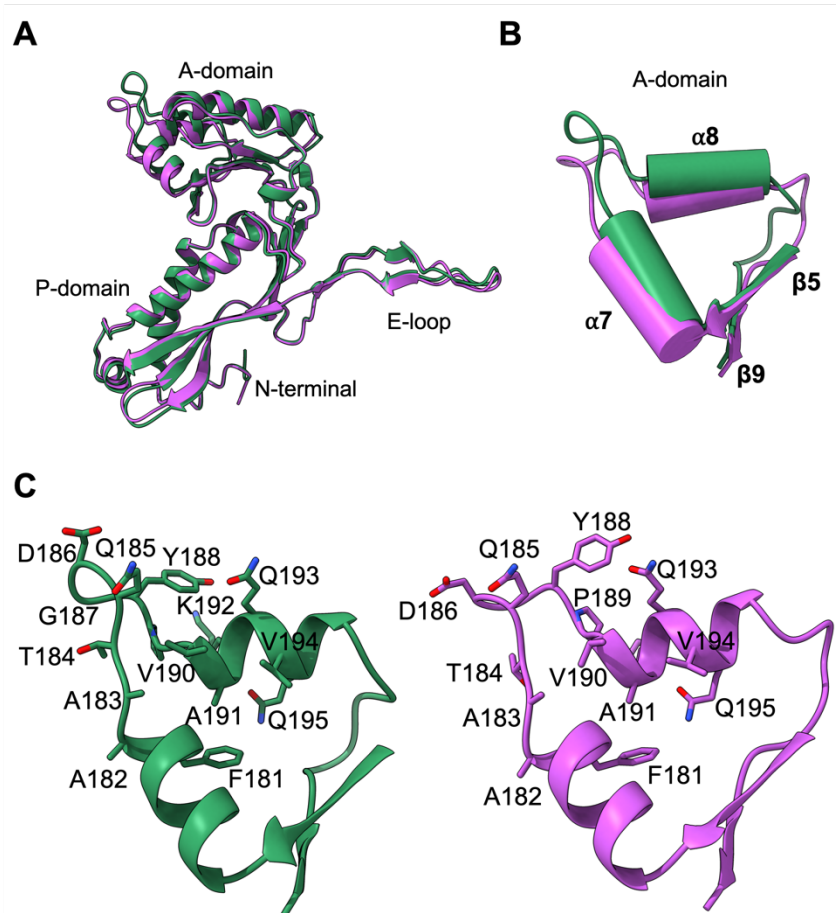

**Figure 4 – figure supplement 3: Comparison of the A-domain of 'closed' and 'open' pentamer structures**

**A:** Overlay of the monomers from the 'closed' (green) and 'open' (purple) pentamer conformations displaying shifted A-domains. **B:** Overlay of the A-domain of the 'closed' (green) and 'open' (purple) conformations highlighting the change in alpha helices 7 and 8. **C:** The residues present at the 5-fold pore and in alpha helices 7 and 8.

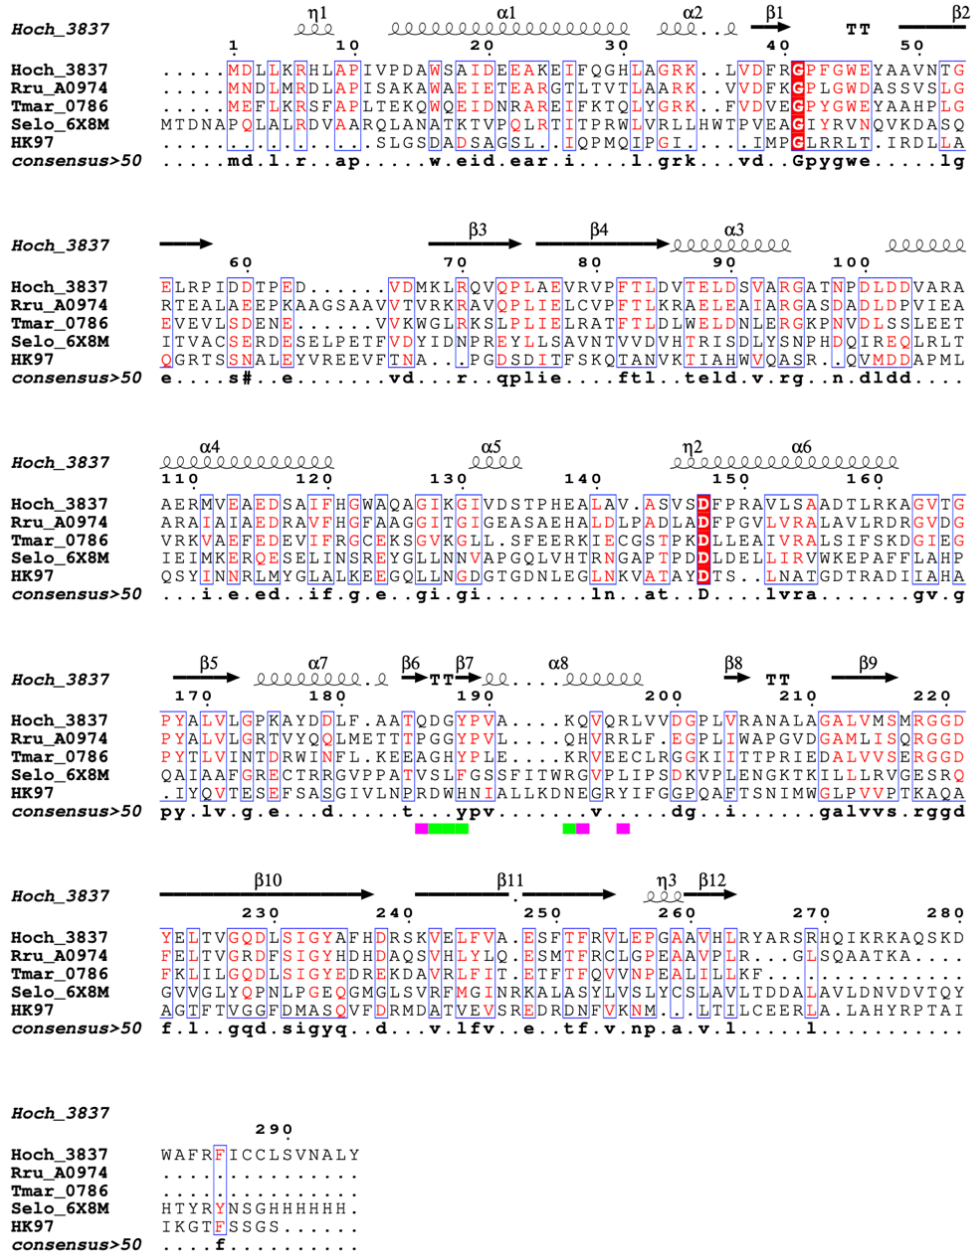

**Figure 4 – figure supplement 4: Sequence alignment of encapsulins and HK97.**

Protein sequence alignment of encapsulins from the *H. ochraceum* (Hoch\_3837), *R. rubrum* (Rru\_A0974), *T. maritima* (Tmar\_0786) and *S. elongatus* (Selo\_6X8M). Encapsulins share the HK97-fold from the HK97 bacteriophage capsid which is also shown in the sequence alignment (HK97). The residues in the 5-fold pore in the ‘closed’ pentamer conformation are underlined in purple. The additional residues which become exposed and form the 5-fold pore in the ‘open’ conformation are underlined in green. Protein sequences were sourced from uniprot and the alignment was performed with Clustal Omega, and then formatted using ESPrift.



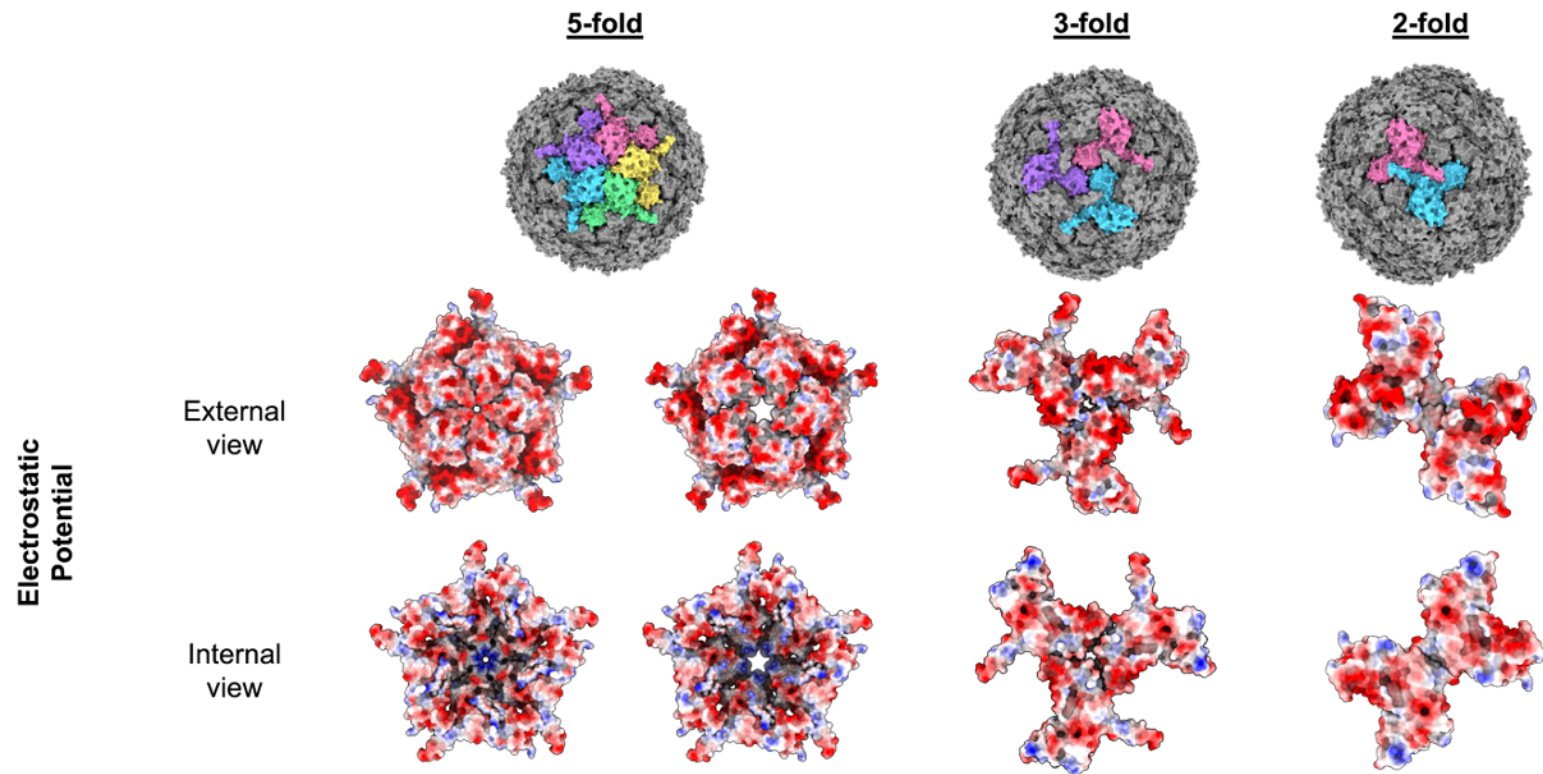

**Figure 4 – figure supplement 5: Electrostatic properties of the encapsulin nanocompartment pores.**

From top to bottom: The top row shows a T=1 encapsulin in three orientations to show the 5-fold, 3-fold and 2-fold symmetry axes. Monomers have been coloured individually (pink, yellow, green, blue and purple) to highlight the symmetry axes. The second and third row show the 5-fold (closed and open conformations), 3-fold and 2-fold Loaded-Enc symmetry axes coloured with electrostatic surfaces (positive charges shown in red and negative in blue).

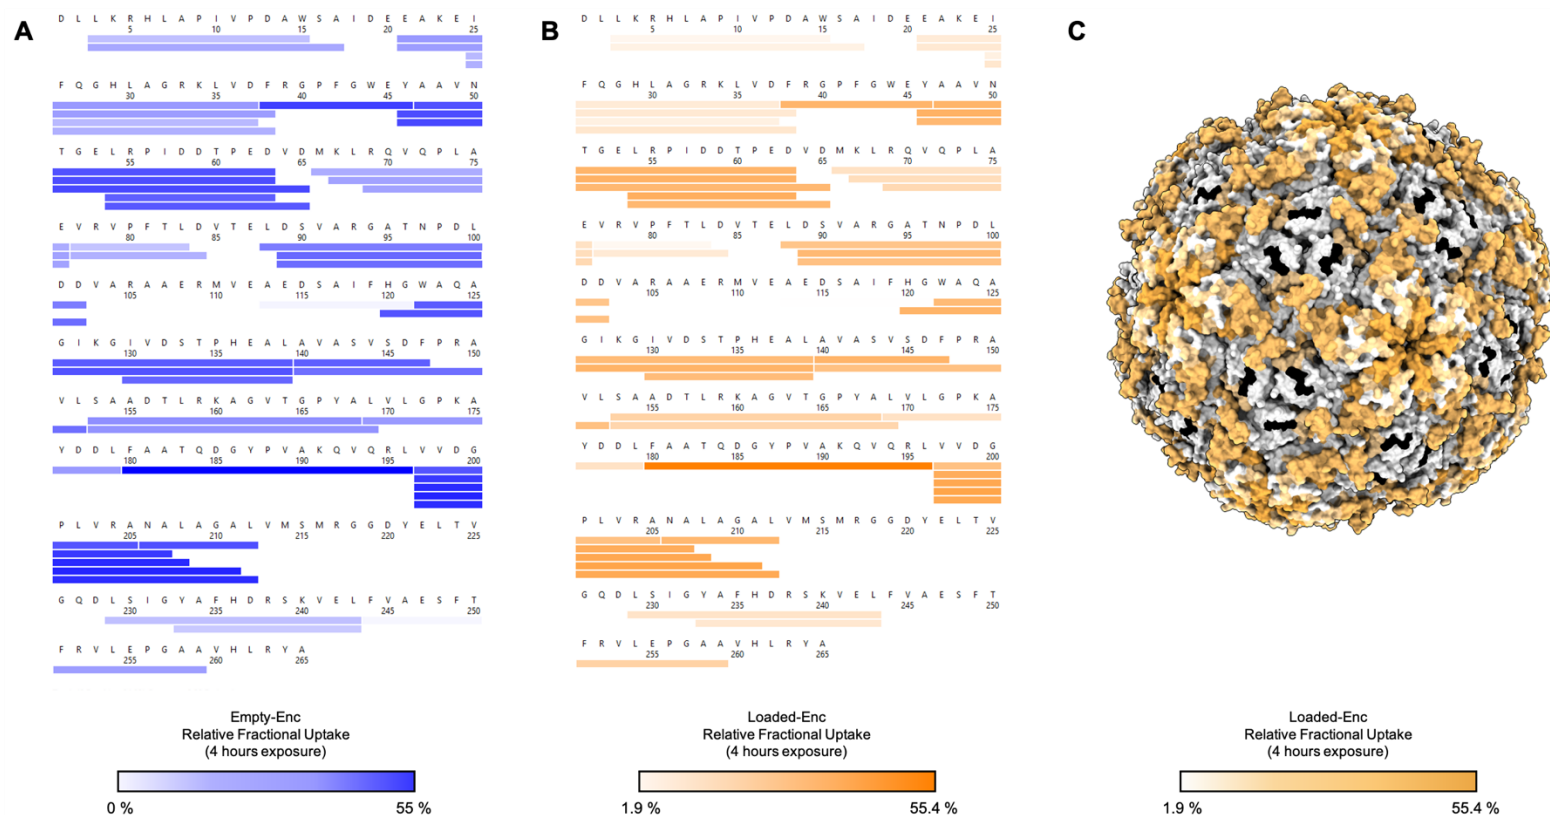

**Figure 6 – figure supplement 1: Sequence coverage and deuterium uptake after HDX MS analysis of Empty-Enc and Loaded-Enc peptides.** HDX coverage maps showing the relative fractional deuterium uptake for both Empty-Enc (**A**) and Loaded-Enc (**B**) after 4 hours of deuterium labelling. There are 40 observed peptides common to both states, providing 84 % protein sequence coverage with 2.35 redundancy. Color keys are shown under **A** and **B**. (**C**) The relative fractional uptake of Loaded-Enc displayed on the encapsulin nanocompartment. Areas colored black are representative of no sequence coverage.

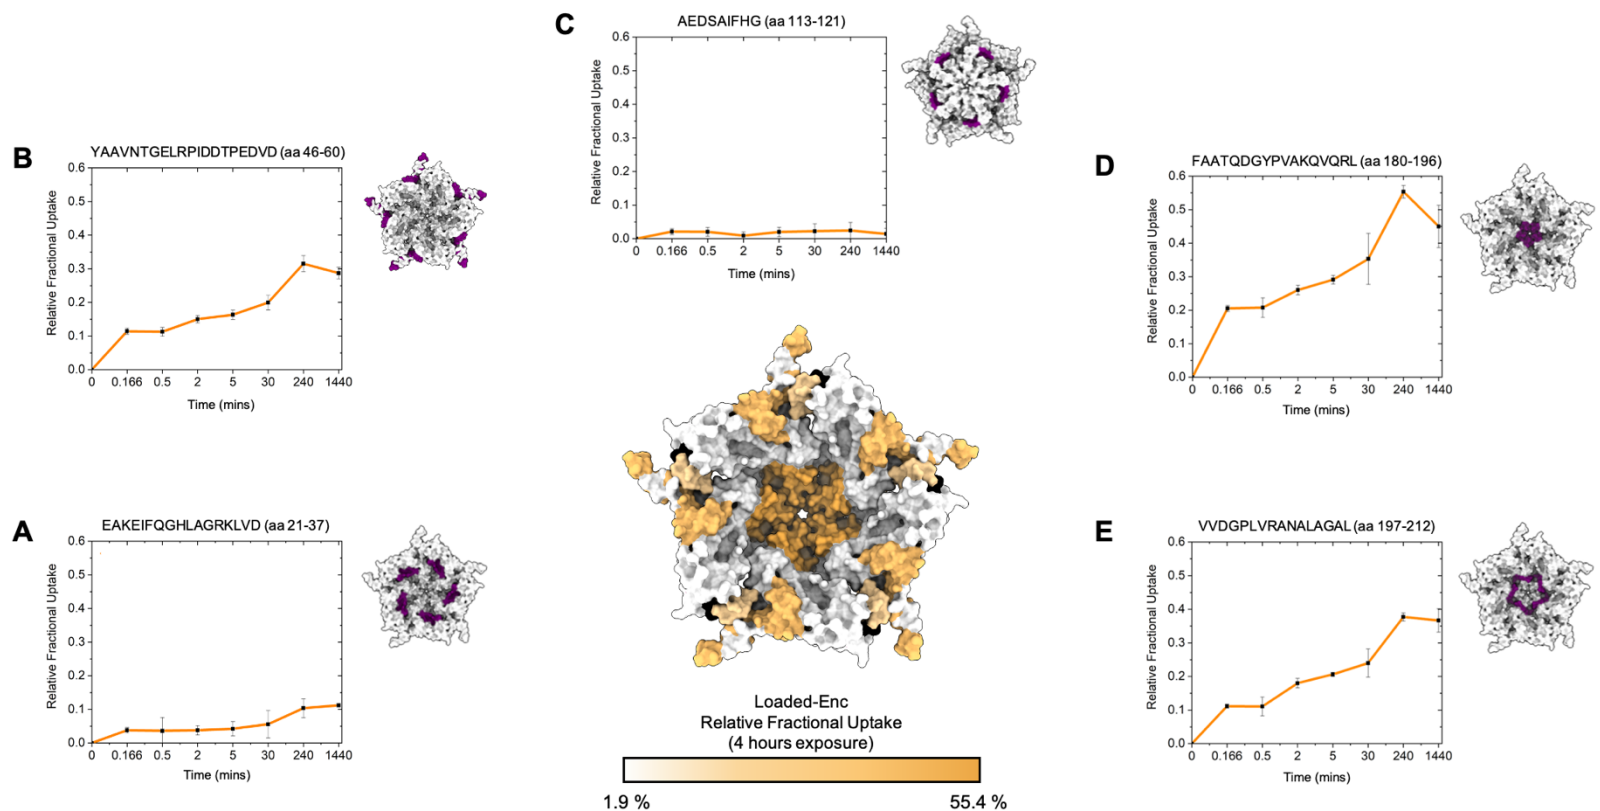

**Figure 6 – figure supplement 2: Deuterium fractional uptake of Loaded-Enc peptides.**

HDX-MS of the encapsulin 5-fold pore highlighting the amount of deuterium incorporation after 4 hours of exposure, colored according to uptake (a color key is shown at the bottom of the central figure). (A) to (E), Uptake plots for individual peptides showing the relative deuterium uptake over time. An encapsulin pentamer is shown with the corresponding peptide sequence colored purple. (A) residues 21-37, whose proximity is close to the proposed localization sequence for EncFtn ( $11.2 \pm 0.2$  % uptake at 4 hours). (B) residues 46-60, which overlays with the proposed 2-fold symmetry pore ( $31.7 \pm 2.2$  % uptake at 4 hours), (C) residues 113-121, a highly protected exterior peptide ( $0.2 \pm 0$  % at 4 hours), (D)

residues 180-196 the potential 5-fold symmetry pore ( $55.4 \pm 2.2$  % at 4 hours), (**E**) interior residue 197-212 in close proximity to the potential 5-fold symmetry pore site ( $37.7 \pm 1.2$  % at 4 hours).

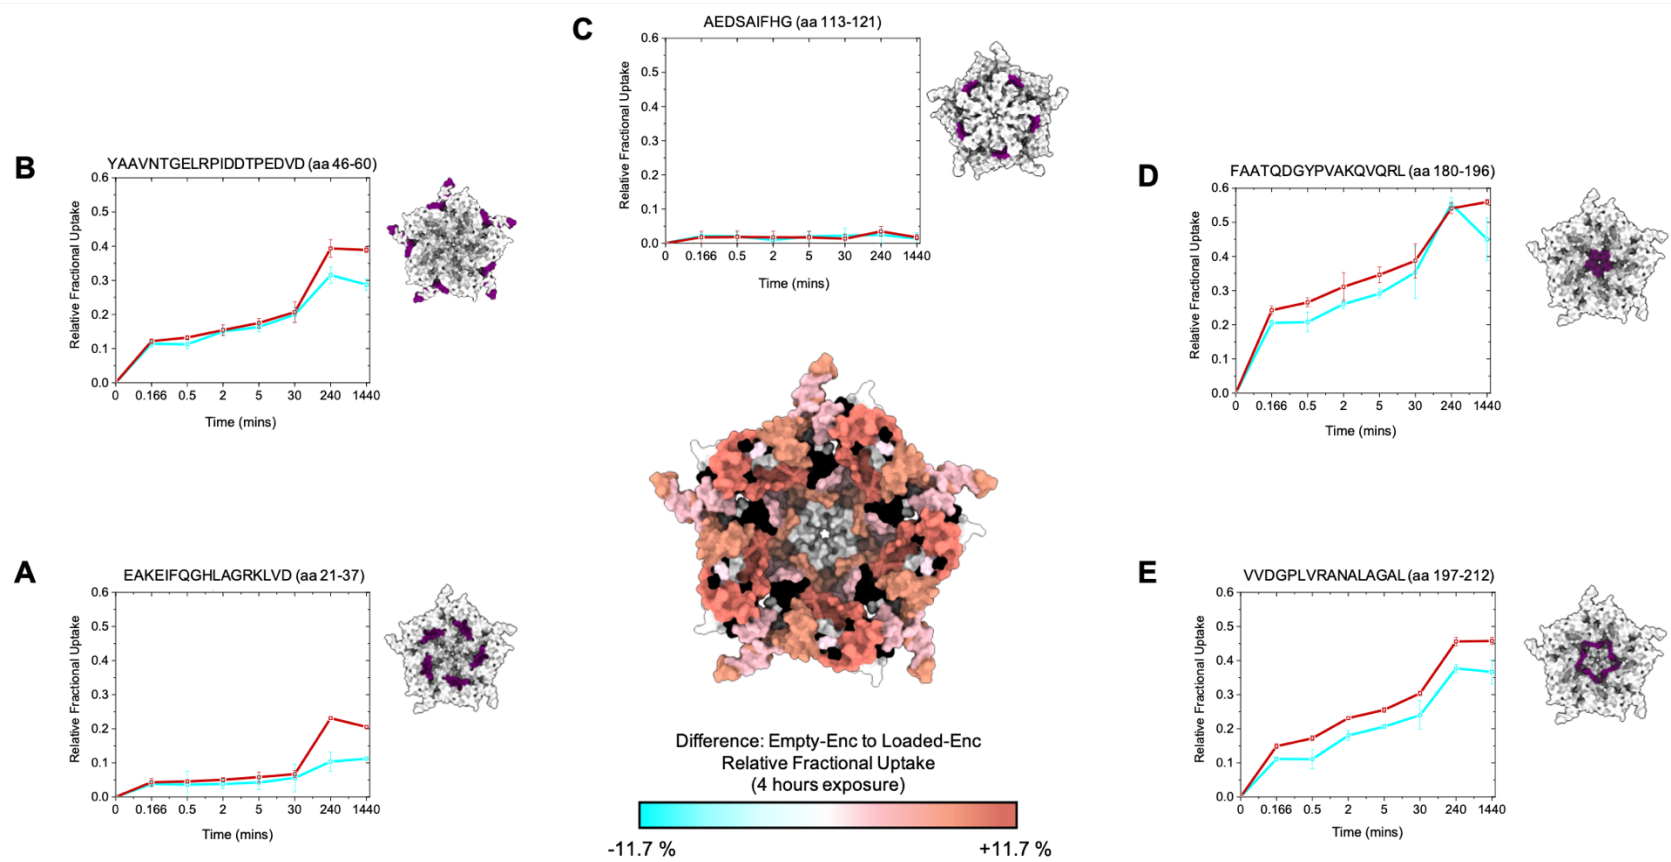

### Figure 6 – figure supplement 3: Differential HDX-MS analysis of Empty-Enc and Loaded-Enc.

The amount of deuterium incorporation over time is shown for five representative peptides (A - E) for both Empty-Enc (r lines) and Loaded-Enc (cyan lines). An encapsulin pentamer is shown next to each uptake chart with the corresponding peptide colored in purple. The central figure shows the difference in exchange is displayed on the structure of the 5-fold pore of encapsulin, with a color key below and areas of no sequence coverage colored black. (A) Location of residues 21-37 difference of  $+11.7 \pm 1.5$  %, (B) residues 46-65 with a difference of  $+7.6 \pm 1.8$  % (C) Location of residues 113-121 with a difference of  $0.1 \pm 0.0$  %, (D) residues 180-196 with a difference of  $0 \pm 0.3$  %, (E) interior residue 197-212 with a difference of  $7.9 \pm 1.7$  %.
